# Supplementary material for: Synthesis of bivalent neogalactolipids via modified Staudinger reaction
Source: Royal Society of Chemistry journal article supplement (doi:10.1039/c2ra01356h), 2012-01-01

## Supplementary Data

### Synthesis of bivalent neogalactolipids *via* modified Staudinger reaction

Ekaterina A. Ivanova,<sup>a</sup> Mikhail A. Maslov,<sup>a\*</sup> Nina G. Morozova,<sup>a</sup> Galina A. Serebrennikova<sup>a</sup>  
and Vladimir V. Chupin<sup>a,b</sup>

<sup>a</sup> *M. V. Lomonosov Moscow State University of Fine Chemical Technologies, 86 Vernadskiy ave.*

*Moscow, Russian Federation. Fax: +7(495)9368901; Tel: +7(495)9368901; E-mail: mamaslov@mail.ru*

<sup>b</sup> *Shemyakin-Ovchinnikov Institute of bioorganic chemistry RAS, 16/10 Ul. Miklukho-Maklaya, Moscow, Russian Federation, Fax: +7(495)3355033; Tel: +7(495)3352733; E-mail: chupin@nmr.ru*

### General methods

Molecular sieves were activated at 180°C under diminished pressure for 2 h. DCM and all amines were purified and dried by distillation from CaH<sub>2</sub> immediately before the experiment. All solvents for a column chromatography were distilled before using. Thin layer chromatography was performed using pre-coated aluminum plates (Kieselgel 60 F<sub>254</sub>, Merck), which were visualized with the phosphomolybdic acid – ceric sulfate reagent. Flash column chromatography (FC) was performed on Kieselgel 60 (40–63 μm, Merck). <sup>1</sup>H and <sup>13</sup>C NMR spectra were recorded at 24°C in Bruker DPX-300, and Bruker Avance-600 spectrometers in CDCl<sub>3</sub> as a solvent unless otherwise stated. The signals of SiMe<sub>4</sub> (δ = 0.00 ppm) and CDCl<sub>3</sub> (δ = 77.16 ppm) were used as internal references. *J* values are given in Hz. Signals were assigned by 2D proton–proton (COSY) shift correlation spectra. Mass spectra were recorded in a Bruker Ultraflex time-of-flight mass spectrometer using 2,5-dihydroxybenzoic acid as a matrix.

### [*rac*-2,3-Bis(tetradecyloxy)propyl] *N*-(7-aza-10-carboxy-8-oxodecyl)carbamate (**3a**)

Succinic anhydride (0.018 g, 0.195 mmol) was added to a solution of [*rac*-2,3-bis(tetradecyloxy)propyl] *N*-(6-aminoethyl)carbamate (**2a**) (0.111 g, 0.177 mmol) and Et<sub>3</sub>N (0.062 mL, 0.444 mmol) in dry DCM (10 mL). The mixture was refluxed for 2 h, cooled to room temperature and washed with 3% aq. HCl (6 × 5 mL), water to pH 7.0. The organic extract was dried (Na<sub>2</sub>SO<sub>4</sub>), filtered, and concentrated under diminished pressure. The residue was purified by column chromatography on a silica gel (chloroform – methanol, 25:1) to give compound **3a** (0.087 g, 68%) as a colorless amorphous solid. δ<sub>H</sub> (300 MHz; CDCl<sub>3</sub>; Me<sub>4</sub>Si): 0.87 (6 H, t, *J* 6.7, 2 (CH<sub>2</sub>)<sub>11</sub>CH<sub>3</sub>), 1.11–1.39 (48 H, m, 2 (CH<sub>2</sub>)<sub>11</sub>, (CH<sub>2</sub>)<sub>2</sub>), 1.40–1.64 (8 H, m, 2 NHCH<sub>2</sub>CH<sub>2</sub>, 2 OCH<sub>2</sub>CH<sub>2</sub>), 2.40–2.61 (4 H, m, C(O)(CH<sub>2</sub>)<sub>2</sub>C(O)), 3.04–3.30 (4 H, m, 2 CH<sub>2</sub>NH), 3.40–3.54 (6 H, m, 2 OCH<sub>2</sub>, CHCH<sub>2</sub>O), 3.57–3.63 (m, 1H, CHCH<sub>2</sub>O), 4.07 (1 H, dd, *J* 5.3, 11.3) and 4.16 (1 H, dd, *J* 3.8, 11.3, CH<sub>2</sub>OC(O)), 4.92–5.1 (1 H, m, NH), δ<sub>C</sub> (75 MHz; CDCl<sub>3</sub>): 14.21, 22.80, 26.18, 26.23, 29.29, 29.48, 29.63, 29.76, 29.78, 29.82, 30.14, 32.05, 39.50, 40.80, 47.37, 51.92, 64.65, 66.72, 70.59, 70.74, 71.93, 76.74, 77.03, 77.16, 77.58, 156.82. *m/z*: 749.540 (M<sup>+</sup>+Na, 100%).

(Cholest-5-en-3β-yl) *N*-(7-aza-10-carboxy-8-oxodecyl)carbamate (**3b**) was prepared at the same way as compound **3a** from compound **2b** (0.500 g, 0.945 mmol), succinic anhydride (0.189 g, 1.889 mmol) and Et<sub>3</sub>N (0.329 mL, 2.364 mmol). After work-up the residue, was purified by column chromatography on a silica gel (chloroform – methanol, 10:1) to give compound **3b** (0.393 g, 66%) as a colorless amorphous solid. δ<sub>H</sub> (300 MHz; CDCl<sub>3</sub>; Me<sub>4</sub>Si): 0.66 (3 H, s, C(13)Me Chol), 0.85 (3 H, d, *J* 6.5, C(25)Me Chol), 0.86 (3 H, d, *J* 6.5, C(25)Me Chol), 0.89 (3 H, d, *J* 6.5, C(20)Me Chol), 0.99 (3 H, s, C(10)Me Chol), 1.03–1.67 (28 H, m, Chol, NHCH<sub>2</sub>(CH<sub>2</sub>)<sub>4</sub>), 1.72–2.06 (6 H, m, Chol), 2.17–2.38 (2 H, m, C(4)H<sub>2</sub> Chol), 2.39–2.53 (2 H, m,

$\text{CH}_2\text{COOH}$ ), 2.55-2.73 (2 H, m,  $\text{CH}_2\text{CH}_2\text{COOH}$ ), 3.01-3.17 (2 H, m,  $\text{CH}_2\text{NH}$ ), 3.18-3.30 (2 H, m,  $\text{CH}_2\text{NH}$ ), 4.33-4.58 (1 H, m, 3-H Chol), 4.80-4.98 (1 H, m,  $\text{NH}$ ), 5.27-5.41 (1 H, m, 6-H Chol), 6.24-6.60 (1 H, m,  $\text{NH}$ ).  $\delta_c$  (75 MHz;  $\text{CDCl}_3$ ): 176.05, 172.76, 162.97, 156.67, 139.89, 122.62, 74.56, 56.78, 56.31, 50.11, 42.41, 40.57, 39.83, 39.62, 39.41, 38.65, 37.08, 36.65, 36.29, 35.90, 31.99, 31.10, 30.22, 29.77, 29.25, 29.10, 28.33, 28.25, 28.10, 26.04, 24.39, 23.95, 22.92, 22.66, 21.14, 19.43, 18.82, 11.96.  $m/z$ : 651.292 ( $\text{M}^+\text{Na}$ , 100%).

#### 8-chloro-1-(2,3,4,6-tetra-*O*-acetyl- $\beta$ -D-galactopyranosyloxy)-3,6-dioxaoctane (5)

$\text{HgCN}_2$  (2.247 g, 8.896 mmol) and 4 Å crushed molecular sieves were added to a solution of compound 4 (1.00g, 5.931 mmol) in dry DCM (15 mL) at 20°C under stirring. After 15 min, the solution of 2,3,4,6-tetra-*O*-acetyl- $\alpha$ -D-galactopyranosyl bromide (3.658 g, 8.896 mmol) in dry DCM (15 mL) was added dropwise within 1 h. After 4 h at 40 °C, the reaction mixture was cooled to ambient temperature, filtered through Celite 545<sup>®</sup> pad, and washed with 20% aq. KI (4 × 50 mL), water (3 × 30 mL). The organic layer was dried ( $\text{Na}_2\text{SO}_4$ ), filtered, and concentrated under diminished pressure. The residue was purified by column chromatography on a silica gel (toluene – ethyl acetate, 2:1) to give compound 5 (2.078 g, 75%) as a yellowish oil.  $\delta_H$  (300 MHz;  $\text{CDCl}_3$ ;  $\text{Me}_4\text{Si}$ ): 1.91 (3H, s), 1.98 (3H, s), 2.99 (3H, s), 2.08 (3H, s, 4 OCOMe), 3.50-3.64 (8 H, m,  $\text{CH}_2\text{O}(\text{CH}_2)_2\text{OCH}_2$ ), 3.65-3.75 (3 H, m,  $\text{CH}_2\text{Cl}$ ,  $\text{OCH}_a\text{H}$ ), 3.81-3.93 (2 H, m, 5-H Gal,  $\text{OCH}_b\text{H}$ ), 4.06 (1 H, dd,  $J$  6.5, 11.1, 6- $\text{H}_a$  Gal), 4.07 (1 H, dd,  $J$  6.5, 11.1, 6- $\text{H}_b$  Gal), 4.52 (1 H, d,  $J$  8.0, 1-H Gal), 4.95 (1 H, dd,  $J$  3.4, 10.5, 3-H Gal), 5.14 (1 H, dd,  $J$  8.0, 10.5, 2-H Gal), 5.32 (1 H, dd,  $J$  1.0, 3.4, 4-H Gal).  $\delta_c$  (75 MHz;  $\text{CDCl}_3$ ): 20.56, 20.64, 20.66, 20.76, 42.78, 61.25, 67.01, 68.73, 69.02, 70.33, 70.55, 70.58, 70.61, 70.83, 101.25, 169.46, 170.12, 170.24, 170.36.  $m/z$ : 521.893 ( $\text{M}^+\text{Na}$ , 100%).

#### 8-azido-1-(2,3,4,6-tetra-*O*-acetyl- $\beta$ -D-galactopyranosyloxy)-3,6-dioxaoctane (6)

Sodium azide (0.542 g, 8.329 mmol) was added to a solution of compound 5 (2.078 g, 4.164 mmol) in dry DMF (100 mL) and stirred for 40 h at 100° C. The solvent was removed under diminished pressure, the residue was dissolved in DCM (70 mL) and washed by 3% aq. HCl (4 × 20 mL) and water (3 × 20 mL). The organic layer was dried ( $\text{Na}_2\text{SO}_4$ ), filtered, the solvent was removed under diminished pressure. Column chromatography on silica gel (toluene – ethylacetate, 1:2) gave compound 6 (1.747 g, 83%) as a yellowish oil.  $\delta_H$  (300 MHz;  $\text{CDCl}_3$ ;  $\text{Me}_4\text{Si}$ ): 1.92 (3H, s), 1.98 (3H, s), 2.00 (3H, s), 2.08 (3H, s, 4 OCOMe), 3.35 (2 H, t,  $J$  5.0,  $\text{CH}_2\text{N}_3$ ), 3.40-3.64 (8 H, m,  $\text{CH}_2\text{O}(\text{CH}_2)_2\text{OCH}_2$ ), 3.65-3.75 (1 H, m,  $\text{OCH}_a\text{H}$ ), 3.81-3.93 (2 H, m, 5-H Gal,  $\text{OCH}_b\text{H}$ ), 4.06 (1 H, dd,  $J$  6.6, 11.1, 6- $\text{H}_a$  Gal), 4.11 (1 H, dd,  $J$  6.5, 11.1, 6- $\text{H}_b$  Gal), 4.51 (1 H, d,  $J$  8.0, 1-H Gal), 4.95 (1 H, dd,  $J$  3.4, 10.5, 3-H Gal), 5.15 (1 H, dd,  $J$  8.0, 10.5, 2-H Gal), 5.32 (1 H, dd,  $J$  1.0, 3.4, 4-H Gal).  $\delta_c$  (75 MHz;  $\text{CDCl}_3$ ): 20.72, 20.81, 20.90, 50.77, 61.39, 67.14, 68.89, 69.17, 70.12, 70.51, 70.73, 70.78, 70.82, 71.00, 101.45, 169.63, 170.31, 170.41.  $m/z$ : 528.031 ( $\text{M}^+\text{Na}$ , 100%).

#### 8-amino-1-(2,3,4,6-tetra-*O*-acetyl- $\beta$ -D-galactopyranosyloxy)-3,6-dioxaoctane (7)

A catalytic amount of 10% Pd/C was added to a solution of compound 6 (0.721 g, 1.978 mmol) and ammonium formate (0.500 g, 7.913 mmol) in methanol (10 mL) heated to 60 °C. After 15 min the catalyst was filtered off and methanol was removed under diminished pressure. Column chromatography on a silica gel (DCM – methanol, 10:1) gave compound 7 (0.308 g, 45%) as a colorless oil.  $\delta_H$  (300 MHz;  $\text{CDCl}_3$ ;  $\text{Me}_4\text{Si}$ ): 1.98 (3H, s), 2.05 (3H, s), 2.08 (3H, s), 2.18 (3H, s, 4 OCOMe), 3.15-3.26 (2 H, m,  $\text{CH}_2\text{NH}_2$ ), 3.49-3.70 (8 H, m,  $\text{CH}_2\text{O}(\text{CH}_2)_2\text{OCH}_2$ ), 3.73-4.04 (3 H, m,  $\text{OCH}_2$ , 5-H Gal), 4.05-4.22 (2 H, m, 6-H Gal), 4.55 (1 H, d,  $J$  7.9, 1-H Gal), 5.03 (1 H, dd,  $J$  3.3, 10.5, 3-H Gal), 5.16 (1 H, dd,  $J$  7.9, 10.5, 2-H Gal), 5.38 (1 H, dd,  $J$  0.8, 3.3, 4-H Gal), 5.90-6.70 (2 H, m,  $\text{NH}_2$ ).  $\delta_c$  (75 MHz;  $\text{CDCl}_3$ ): 20.74, 20.84, 20.86, 21.03, 39.95, 61.33, 66.83, 67.11, 68.95, 69.19, 70.10, 70.21, 70.47, 70.81, 70.83, 101.38, 170.14, 170.30, 170.42, 170.63.  $m/z$ : 480.400 ( $\text{M}^+ + \text{H}$ , 100%)

**1,5-Bis{N-[8-(2,3,4,6-tetra-O-acetyl-β-D-galactopyranosyloxy)-3,6-dioxaoctyl]}-N-tert-butylloxycarbonyl-L-glutaminamid (8)**

A solution of Boc-L-glutamic acid (0.074 g, 0.302 mmol) and HOBt (0.090 g, 0.664 mmol) in anhydrous THF (5 mL) was added under the argon atmosphere to a solution of azide **6** (0.335 g, 0.664 mmol) in anhydrous THF (15 mL). After stirring for 15 min the solution was cooled to 0 °C and DIC (0.104 mL, 0.664 mmol) was added and the mixture was additionally stirred for 15 min, then tributylphosphine (0.302 mL, 1.208 mmol) was added. After 1 h the reaction mixture was heated to 22 °C and stirred for 48 h. The reaction was quenched with water (30 mL) and after stirring for 20 min the products were extracted with ethyl acetate (4 × 70 mL), the obtained organic extract was dried (Na<sub>2</sub>SO<sub>4</sub>), filtered and the solvent was removed under diminished pressure. Column chromatography on silica gel (CHCl<sub>3</sub> – MeOH, 60:1) gave compound **8** (0.304 g, 86%) as a colorless crystallizing oil. δ<sub>H</sub> (300 MHz; CDCl<sub>3</sub>; Me<sub>4</sub>Si): 1.36 (9 H, s, CMe<sub>3</sub>), 1.85–2.00 (22 H, m, 6 OCOMe, (CH<sub>2</sub>)<sub>2</sub> Glu), 2.08 (6 H, s, 2 OCOMe), 3.25–3.79 (24 H, m, 2 CH<sub>2</sub>NH, 2 CH<sub>2</sub>O(CH<sub>2</sub>)<sub>2</sub>OCH<sub>2</sub>, 2 OCH<sub>2</sub>), 3.82–3.96 (2 H, m, 2 × 5-H Gal), 4.02–4.16 (5 H, m, 2 × 6-H Gal, CHNH Glu), 4.54 (2 H, d, *J* 7.9, 2 × 1-H Gal), 4.95 (2 H, dd, *J* 3.4, 10.5, 2 × 3-H Gal), 5.15 (2 H, dd, *J* 7.9, 10.5, 2 × 2-H Gal), 5.33 (2 H, dd, *J* 0.8, 3.4, 2 × 4-H Gal), 5.53–5.67 (1 H, m, NH), 6.50–6.80 (1 H, m, NH), 6.95–7.16 (1 H, m, NH). δ<sub>C</sub> (75 MHz; CDCl<sub>3</sub>): 20.74, 20.82, 20.93, 28.44, 36.63, 37.85, 38.73, 39.39, 53.92, 61.36, 67.07, 68.88, 69.72, 69.33, 69.73, 70.23, 70.36, 70.63, 70.69, 70.74, 70.79, 70.90, 70.94, 101.45, 161.58, 170.32. *m/z*: 1192.251 (M<sup>+</sup>+Na, 100%)

**1,5-Bis{N-[8-(2,3,4,6-tetra-O-acetyl-β-D-galactopyranosyloxy)-3,6-dioxaoctyl]}-L-glutaminamid trifluoroacetate(9)**

Anhydrous TFA (1.05 mL, 12.768 mmol) was added to a solution of compound **8** (0.304 g, 0.319 mmol) in DCM (5 mL). The reaction mixture was stirred for 2 h at 24 °C, and then DCM was removed under diminished pressure. The residue was purified by column chromatography on silica gel (CHCl<sub>3</sub> – MeOH – 1% aq. CH<sub>3</sub>COOH, 14:1:0.02) to give compound **9** (0.212 g, 72%) as a colorless crystallizing oil. δ<sub>H</sub> (300 MHz; CDCl<sub>3</sub>; Me<sub>4</sub>Si): 1.85–2.08 (28 H, m, 8 OCOMe, (CH<sub>2</sub>)<sub>2</sub> Glu), 3.25–3.79 (22 H, m, 2 CH<sub>2</sub>NH, 2 CH<sub>2</sub>O(CH<sub>2</sub>)<sub>2</sub>OCH<sub>2</sub>, 2 OCH<sub>2</sub>H), 3.77–3.96 (4 H, m, 2 × 5-H Gal, 2 OCH<sub>2</sub>H), 4.00–4.15 (5 H, m, 2 × 6-H Gal, CHNH<sub>2</sub>), 4.50 (2 H, d, *J* 7.9, 2 × 1-H Gal), 4.93 (2 H, dd, *J* 3.4, 10.5, 2 × 3-H Gal), 5.06 (2 H, dd, *J* 7.9, 10.5, 2 × 2-H Gal), 5.28 (2 H, dd, *J* 0.8, 3.4, 2 × 4-H Gal). δ<sub>C</sub> (75 MHz; CDCl<sub>3</sub>): 12.40, 17.58, 20.42, 20.46, 20.51, 20.61, 25.04, 29.61, 31.57, 38.96, 42.86, 51.87, 54.79, 61.36, 67.23, 67.61, 68.93, 68.97, 69.92, 70.23, 70.50, 70.56, 70.95, 101.17, 169.94, 170.44, 170.61, 170.80, 172.04, 174.16, 174.56. *m/z*: 1070.380 (M<sup>+</sup>+Na, 100%)

**1,5-Bis{N-[8-(2,3,4,6-tetra-O-acetyl-β-D-galactopyranosyloxy)-3,6-dioxaoctyl]-N-[5,12-diaza-1,4,13-trioxo-13-(rac-2,3-di(tetradecyloxy)prop-1-yloxy)tridecyl]}-L-glutaminamid (10a)**

A solution of compound **9** (0.138 g, 0.109 mmol) and DIPEA (56 μL, 0.326 mmol) in dry DMF (4 mL) was stirred at 0 °C for 15 min, then a solution of compound **3a** (0.119 g, 0.163 mmol) and HBTU (0.124 g, 0.326 mmol) in dry DMF (4 mL) was added dropwise within 10 min. After 72 h at 24 °C, DMF was removed under diminished pressure, the residue was dissolved in chloroform (25 mL), washed with 3% aq. HCl (2 × 10 mL), water to pH 7, dried (Na<sub>2</sub>SO<sub>4</sub>), filtered and the solvent was removed under diminished pressure. Column chromatography on silica gel (CHCl<sub>3</sub> – MeOH, 40:1) gave compound **10a** (0.155 g, 80%) as a colorless crystallizing oil. δ<sub>H</sub> (300 MHz; CDCl<sub>3</sub>; Me<sub>4</sub>Si): 0.86 (6 H, t, *J* 6.7, 2 (CH<sub>2</sub>)<sub>11</sub>CH<sub>3</sub>), 1.14–1.40 (44 H, m, 2 (CH<sub>2</sub>)<sub>11</sub>, CH<sub>2</sub>CH<sub>2</sub>), 1.42–1.62 (8 H, m, CH<sub>2</sub>(CH<sub>2</sub>)<sub>11</sub>, 2 NHCH<sub>2</sub>CH<sub>2</sub>), 1.92–2.19 (26 H, m, 8 OCOMe, CH<sub>2</sub> Glu), 2.20–2.40 (2 H, m, CH<sub>2</sub> Glu), 2.45–2.63 (4 H, m, C(O)(CH<sub>2</sub>)<sub>2</sub>C(O)), 3.10–3.26 (4 H, m, 2 NHCH<sub>2</sub>), 3.33–3.49 (8 H, m, 2 CH<sub>2</sub>NH, OCH<sub>2</sub>, CHCH<sub>2</sub>O), 3.50–3.78 (22 H, m, 2 CH<sub>2</sub>O(CH<sub>2</sub>)<sub>2</sub>OCH<sub>2</sub>, OCH<sub>2</sub>CH<sub>2</sub>(CH<sub>2</sub>)<sub>11</sub>CH<sub>3</sub>, CH), 3.88–4.00 (2 H, m, 2 × 5-H Gal), 4.01–4.21 (6 H, m, 2 × 6-H Gal, CHCH<sub>2</sub>OC(O)), 4.30–4.43 (1 H, m, NH), 4.54 (1 H, d, *J* 7.9, 1-H Gal), 4.57 (1 H, d, *J* 7.9, 1-H Gal), 4.81–4.94 (1 H, m, NH), 5.02 (2 H, dd, *J* 3.4, 10.5, 2 × 3-H Gal), 5.17 (2

H, dd,  $J$  7.9, 10.5,  $2 \times 2$ -H Gal), 5.37 (2 H, dd,  $J$  0.8, 3.4,  $2 \times 4$ -H Gal), 6.05-6.16 (1 H, m, NH), 6.67-6.78 (1 H, m, NH).  $\delta_{\text{H}}$  (75 MHz;  $\text{CDCl}_3$ ): 14.22, 20.70, 20.76, 20.79, 20.90, 22.79, 26.15, 26.21, 26.34, 26.47, 29.50, 29.61, 29.73, 29.76, 29.80, 29.93, 30.13, 31.46, 31.50, 31.58, 31.62, 31.63, 31.66, 32.02, 32.55, 39.23, 39.35, 39.46, 40.91, 52.95, 53.02, 53.04, 61.36, 61.39, 64.32, 67.17, 67.20, 68.97, 69.24, 69.25, 69.65, 69.81, 70.25, 70.29, 70.32, 70.57, 70.65, 70.71, 70.75, 70.78, 70.80, 70.97, 70.98, 71.89, 77.36, 101.45, 101.46, 125.40, 128.33, 129.14, 156.61, 169.71, 169.72, 170.27, 170.28, 170.35, 170.37, 170.55, 170.58, 171.48, 171.54, 171.56, 172.15, 172.46, 172.53, 173.21.  $m/z$ : 1801.946 ( $\text{M}^+ + \text{Na}$ , 100%)

**1,5-Bis{*N*-[8-(2,3,4,6-tetra-*O*-acetyl- $\beta$ -D-galactopyranosyloxy)-3,6-dioxaoctyl]-*N*-[5,12-diaza-13-(cholest-5-ene-3 $\beta$ -yloxy)-1,4,13-trioxotridecyl]-L-glutaminamid (10b)}** was prepared at the same way as compound **10a** from compound **9** (0.100 g, 0.088 mmol), DIPEA (46  $\mu\text{L}$ , 0.266 mmol), compound **3b** (0.084 g, 0.133 mmol) and HBTU (0.101 g, 0.266 mmol). Column chromatography on silica gel ( $\text{CHCl}_3$  – MeOH, 30:1) gave compound **10a** (0.101 g, 72%) as a colorless crystallizing oil.  $\delta_{\text{H}}$  (300 MHz;  $\text{CDCl}_3$ ;  $\text{Me}_4\text{Si}$ ): 0.61 (3 H, s, C(13)Me Chol), 0.78 (3 H, d,  $J$  6.6, C(25)Me Chol), 0.81 (3 H, d,  $J$  6.6, C(25)Me Chol), 0.84 (3 H, d,  $J$  6.5, C(20)Me Chol), 0.89-1.60 (35 H, m, 27 H Chol,  $(\text{CH}_2)_4$ ), 1.62-1.84 (2 H, m,  $\text{CH}_2$  Glu), 1.89-2.08 (24 H, m, 8 OCOMe), 2.12-2.36 (5 H, m,  $\text{CH}_2$  Glu, Chol), 2.40-2.48 (4 H, m, C(O)( $\text{CH}_2$ ) $_2$ C(O)), 2.97-3.23 (4 H, m, 2  $\text{CH}_2\text{NH}$ ), 3.25-3.43 (4 H, m, 2  $\text{CH}_2\text{NH}$ ), 3.43-3.61 (16 H, m, 2  $\text{CH}_2\text{O}(\text{CH}_2)_2\text{OCH}_2$ ), 3.62-3.74 (2 H, m, 2  $\text{OCH}_a\text{H}$ ), 3.80-3.96 (4 H, m,  $2 \times 5$ -H Gal, 2  $\text{OCH}_b\text{H}$ ), 3.99-4.18 (5 H, m,  $2 \times 6$ -H Gal,  $\text{CHNH}$  Glu), 4.24-4.45 (2 H, m, 3-H Chol, NH), 4.48 (1 H, d,  $J$  7.9, 1-H Gal), 4.52 (1 H, d,  $J$  7.9, 1-H Gal), 4.68-4.81 (1 H, m, NH), 4.97 (2 H, dd,  $J$  3.4, 10.5,  $2 \times 3$ -H Gal), 5.12 (2 H, dd,  $J$  7.9, 10.5,  $2 \times 2$ -H Gal), 5.32 (3 H, m,  $2 \times 4$ -H Gal, 6-H Chol), 6.05-6.15 (1 H, m, NH), 6.60-6.70 (1 H, m, NH).  $\delta_{\text{C}}$  (75 MHz;  $\text{CDCl}_3$ ): 11.87, 18.72, 19.34, 20.61, 20.68, 20.70, 20.81, 21.05, 22.57, 22.83, 23.84, 24.30, 26.21, 26.34, 28.01, 28.23, 29.39, 29.70, 29.87, 31.43, 31.59, 31.89, 32.48, 35.80, 36.19, 36.58, 37.01, 38.61, 39.34, 39.52, 39.75, 40.63, 42.32, 50.02, 52.95, 56.15, 56.70, 61.30, 67.11, 68.87, 69.15, 69.53, 69.70, 70.16, 70.24, 70.68, 70.88, 74.23, 77.27, 101.36, 122.48, 139.87, 169.60, 170.17, 170.27, 170.44, 171.44, 172.07, 172.43, 173.08.  $m/z$ : 1702.798 ( $\text{M}^+ + \text{Na}$ , 100%)

**1,5-Bis-[*N*-[8-( $\beta$ -D-galactopiranosyloxy)-3,6-dioxaoctyl]-*N*-[5,12-diaza-1,4,13-trioxo-13-(*rac*-2,3-di(tetradecyloxy)prop-1-yloxy)tridecyl]-L-glutaminamid (1a)]**

A 0.04 M solution of MeONa in MeOH (0.5 mL) was added to a solution of compound **10a** (99 mg, 0.056 mmol) in MeOH (5 mL). After 1 h the reaction mixture was neutralized with 3% aq. HCL (40  $\mu\text{L}$ ) and the solvent was removed under diminished pressure. Column chromatography on silica gel ( $\text{CHCl}_3$  – MeOH – 1% aq.  $\text{CH}_3\text{COOH}$ , 3:1:0.08) gave compound **1a** (73 mg, 92%) as a white amorphous solid.  $\delta_{\text{H}}$  (600 MHz;  $\text{CDCl}_3$ : $\text{CD}_3\text{OD}$  1:1;  $\text{Me}_4\text{Si}$ ): 0.80 (6 H, t,  $J$  7.1, 2  $(\text{CH}_2)_{11}\text{CH}_3$ ), 1.12-1.32 (48 H, m, 2  $(\text{CH}_2)_{11}$ ,  $\text{CH}_2\text{CH}_2$ ), 1.36-1.51 (8 H, m, 2  $\text{CH}_2(\text{CH}_2)_{11}$ , 2  $\text{NHCH}_2\text{CH}_2$ ), 1.80-1.88 (1 H, m) and 2.00-2.08 (1 H, m,  $\text{CH}_2$  Glu), 2.23 (2 H, t,  $J$  7.6,  $\text{CH}_2$  Glu), 2.39-2.51 (4 H, m, C(O)( $\text{CH}_2$ ) $_2$ C(O)), 3.01 (2 H, t,  $J$  7.2,  $\text{CH}_2\text{NHCO}$ ), 3.07 (2 H, t,  $J$  7.2,  $\text{CH}_2\text{NHCO}$ ), 3.29-3.75 (39 H, m, 2  $\text{CH}_2\text{O}(\text{CH}_2)_2\text{OCH}_2$ ,  $2 \times 2$ -H Gal,  $2 \times 3$ -H Gal,  $2 \times 5$ -H Gal,  $2 \times 6$ -H Gal, 2  $\text{OCH}_a\text{H}$ , 2  $\text{OCH}_2\text{CH}_2\text{NH}$ , 2  $\text{CH}_2\text{O}$ ,  $\text{CH}_2\text{CH}$  Gro), 3.80-3.85 (2 H, m,  $2 \times 4$ -H Gal), 3.94-4.00 (3 H, m, 2  $\text{OCH}_b\text{H}$ ,  $\text{OCH}_a\text{H}$  Gro), 4.03 (1 H, dd,  $J$  11.4,  $J$  4.5,  $\text{OCH}_b\text{H}$  Gro), 4.22 (1 H, d,  $J$  7.7, 1-H Gal), 4.23 (1 H, d,  $J$  7.7, 1-H Gal), 4.25 (1 H, dd,  $J$  9.2,  $J$  5.0,  $\text{CHNH}$  Glu).  $\delta_{\text{C}}$  (75 MHz;  $\text{CDCl}_3$ : $\text{CD}_3\text{OD}$  1:1): 14.22, 18.05, 23.16, 23.78, 26.55, 26.62, 26.94, 27.10, 28.47, 29.64, 29.71, 29.78, 29.87, 29.99, 30.16, 30.19, 30.37, 30.48, 31.45, 31.62, 31.73, 32.45, 39.77, 39.91, 41.22, 53.81, 61.84, 64.51, 68.82, 69.64, 69.67, 70.33, 70.42, 70.56, 70.60, 70.66, 70.93, 71.14, 71.78, 71.85, 72.26, 74.07, 75.87, 75.89, 78.71, 103.85, 103.91, 157.97, 173.73, 173.76, 174.41, 174.71, 179.89.  $m/z$ : 1465.085 ( $\text{M}^+ + \text{Na}$ , 100%).

**1,5-Bis-[*N*-[8-( $\beta$ -D-galactopiranosyloxy)-3,6-dioxaoctyl]-*N*-[5,12-diaza-13-(cholest-5-ene-3 $\beta$ -yloxy)-1,4,13-trioxotridecyl]-L-glutaminamid (1b)]** was prepared at the same way as

compound **1a** from **10b** (86 mg, 0.051 mmol). Column chromatography on silica gel ( $\text{CHCl}_3$  –  $\text{MeOH}$  –  $\text{CH}_3\text{COOH}_{\text{aq}}$  (1%), 1:8:0.08) gave compound **1b** (60 mg, 87%).  $\delta_{\text{H}}$  (600 MHz;  $\text{CDCl}_3$ : $\text{CD}_3\text{OD}$  1:1;  $\text{Me}_4\text{Si}$ ): 0.61 (3 H, s, C(13)Me Chol), 0.78 (3 H, d,  $J$  6.6, 2 C(25)Me Chol), 0.84 (3 H, d,  $J$  6.5, C(20)Me Chol), 0.92 (3 H, s, C(10)Me Chol), 0.85-1.56 (34 H, m, Chol,  $(\text{CH}_2)_4$ ), 1.69-1.81 (3 H, m, Chol), 1.82-1.92 (1 H, m) and 1.98-2.08 (1 H, m,  $\text{CH}_2$  Glu), 2.15-2.30 (4 H, m,  $\text{CH}_2$  Glu, 4- $\text{CH}_2$  Chol), 2.37-2.51 (4 H, m, C(O)( $\text{CH}_2$ ) $_2$ C(O)), 3.01 (2 H, t,  $J$  7.2,  $\text{CH}_2\text{NHCO}$ ) 3.06 (2 H, t,  $J$  7.2,  $\text{CH}_2\text{NHCO}$ ), 3.28-3.40 (4 H, m, 2  $\text{OCH}_2\text{CH}_2\text{NH}$ ), 3.41-3.79 (29 H, m, 2  $\text{CH}_2\text{O}(\text{CH}_2)_2\text{OCH}_2$ , 2  $\times$  2-H Gal, 2  $\times$  3-H Gal, 2  $\times$  5-H Gal, 2  $\times$  6-H Gal, 2  $\text{OCH}_3$ H, 3-H Chol), 3.82-3.87 (2 H, m, 2  $\times$  4-H Gal), 3.97-4.04 (2 H, m, 2  $\text{OCH}_2$ H), 4.22 (1 H, d,  $J$  7.6, 1-H Gal), 4.23 (1 H, d,  $J$  7.6, 1-H Gal), 4.26 (1 H, dd,  $J$  9.2,  $J$  5.0,  $\text{CHNH}$  Glu), 5.26-5.32 (1 H, m, 6-H Chol).  $\delta_{\text{C}}$  (75 MHz;  $\text{CDCl}_3$ : $\text{CD}_3\text{OD}$  1:1): 11.49, 18.34, 18.94, 20.79, 22.12, 22.38, 23.47, 23.55, 24.00, 26.09, 26.25, 27.73, 27.93, 28.86, 29.43, 30.79, 31.01, 31.65, 32.01, 35.55, 35.93, 36.32, 36.77, 38.33, 38.94, 38.99, 39.12, 39.26, 39.52, 40.29, 42.07, 47.58, 47.86, 48.15, 48.43, 48.72, 49.00, 49.28, 49.87, 52.99, 55.92, 56.50, 60.96, 61.02, 67.99, 68.72, 68.79, 69.44, 69.55, 69.71, 69.77, 69.81, 69.87, 69.97, 70.90, 71.00, 73.11, 74.17, 102.95, 103.02, 122.22, 139.62, 156.80, 172.85, 163.46, 173.84, 179.18.  $m/z$ : 1366.690 ( $\text{M}^+$ +Na, 100%).

### Lectin-induced agglutination of galactosylated liposomes

Cationic liposomes (100  $\mu\text{L}$ , 1 mM of phospholipid) were diluted in 1.8 ml of 150 mM NaCl followed by incubation with 100  $\mu\text{L}$  of RCA $_{120}$  (1 mg/mL). After rapid mixing the agglutination of the liposomes was estimated at room temperature by the time dependent increase in turbidity, as measured by the absorbance at 450 nm with Helios Alpha spectrometer (Thermo Spectronic).

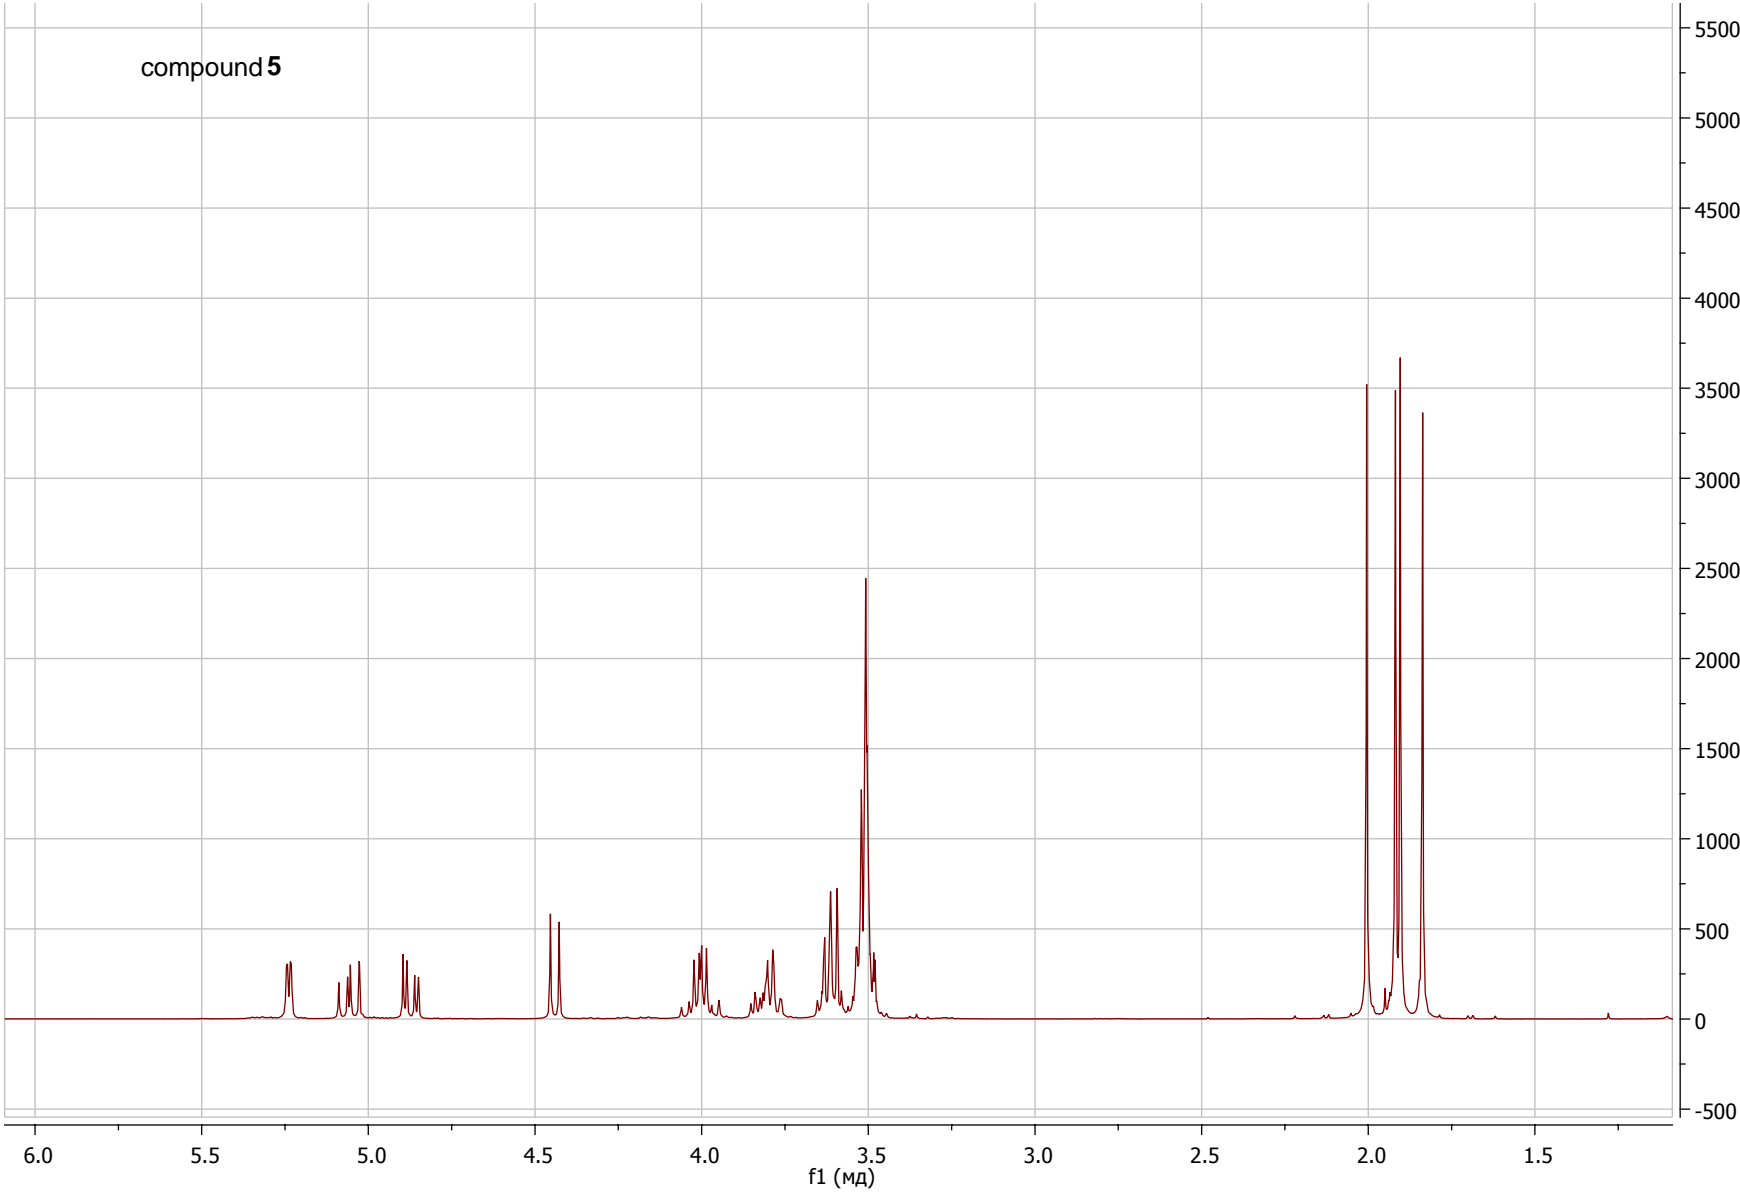

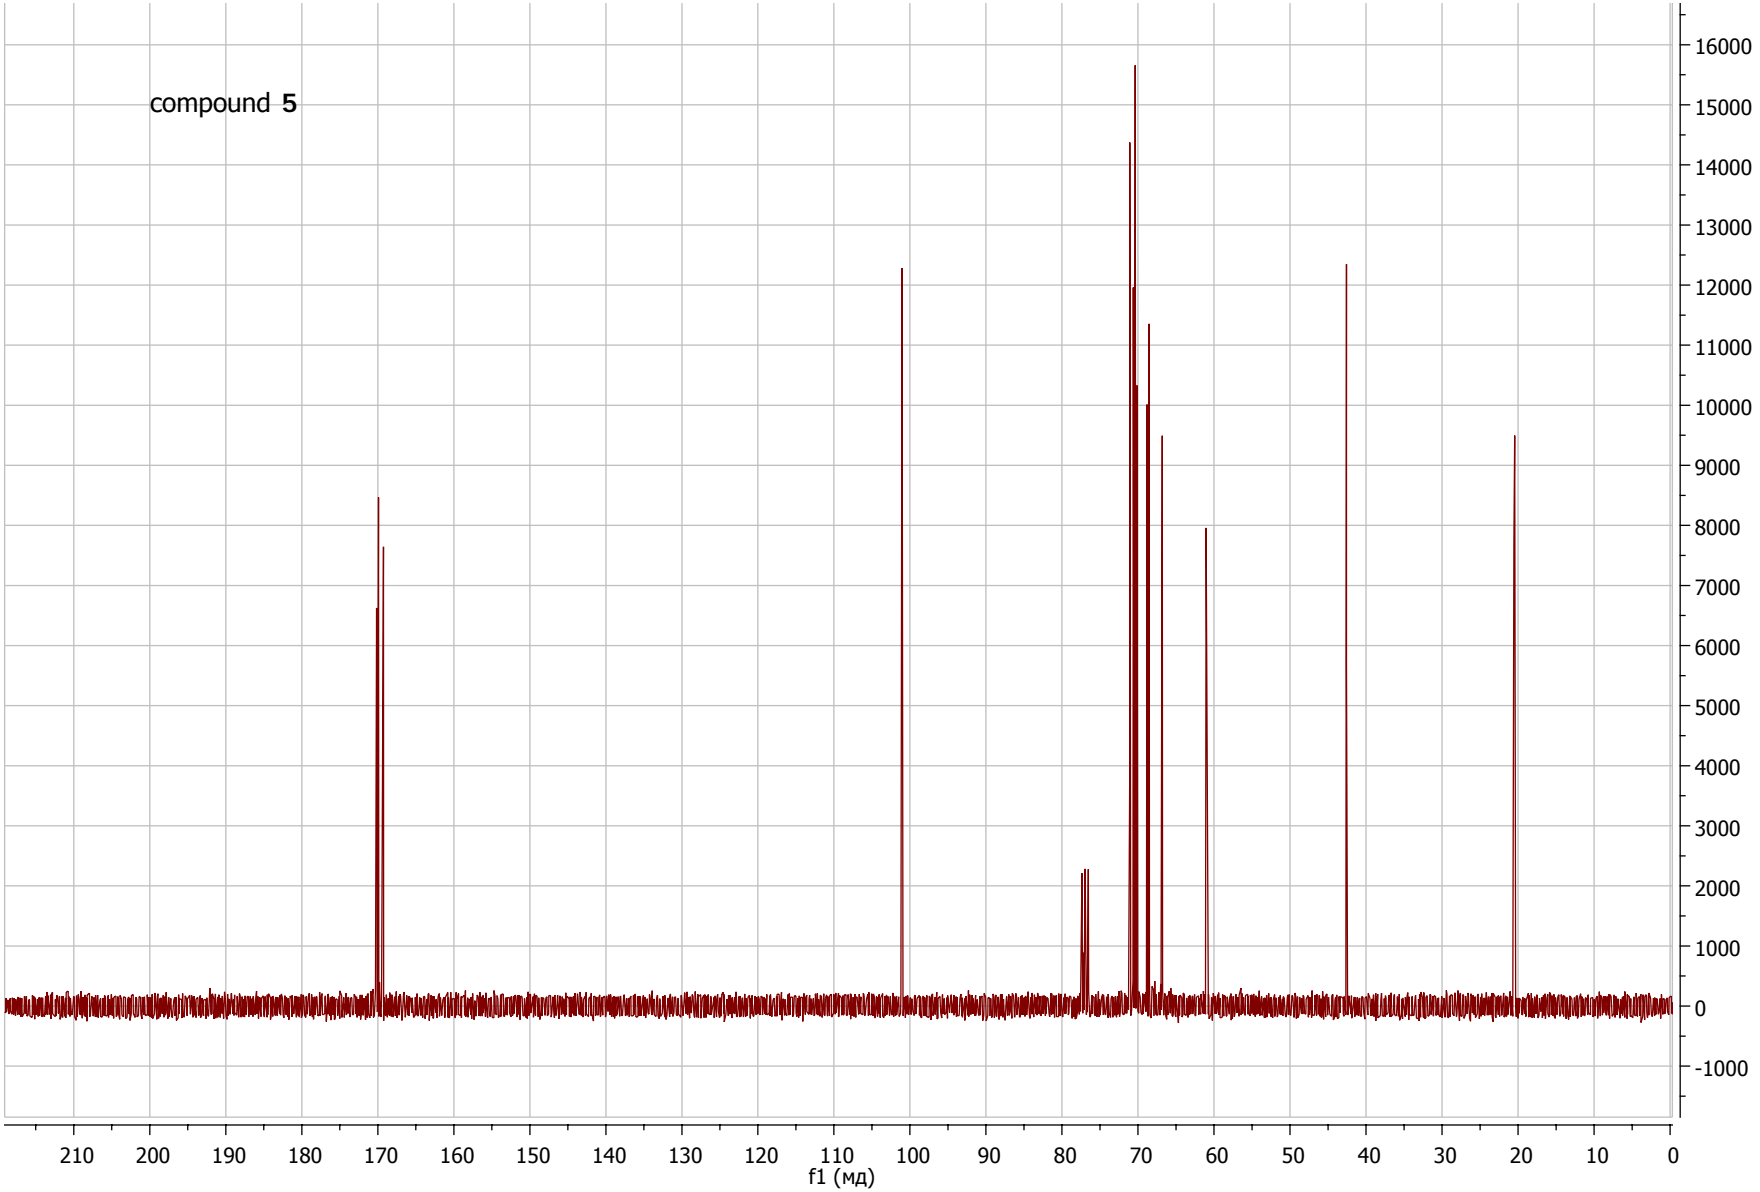

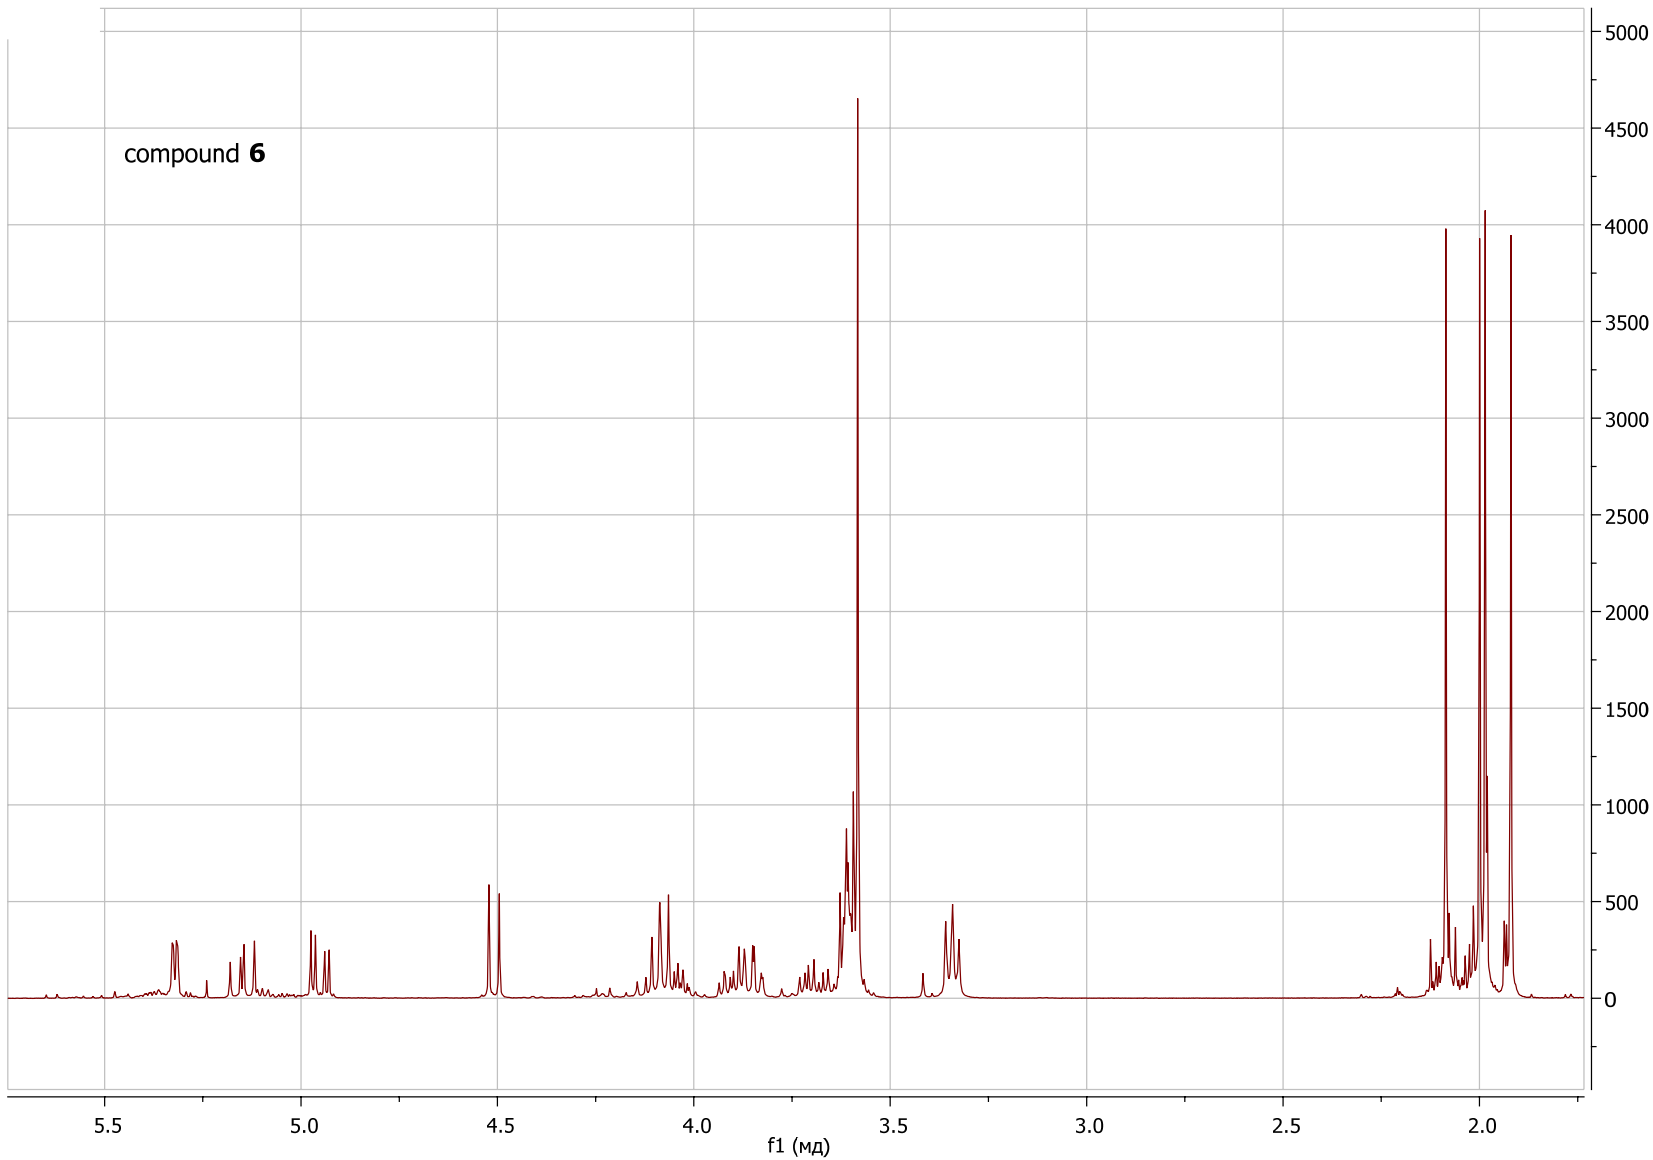

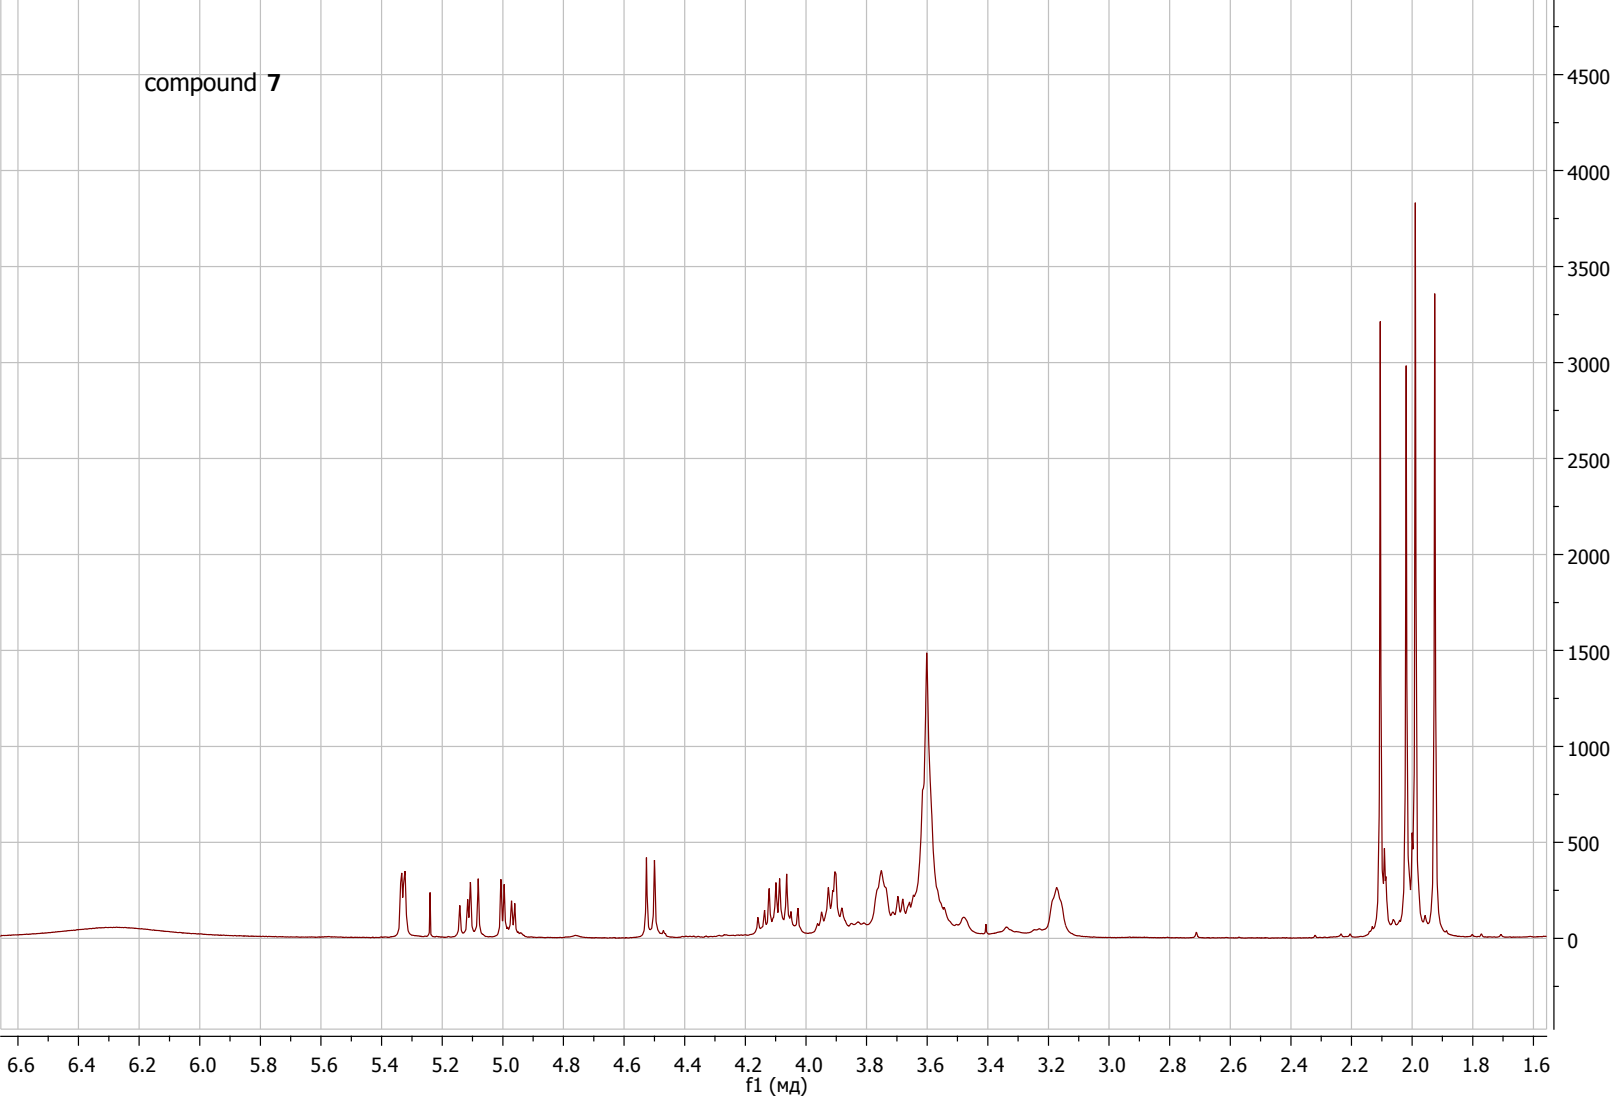

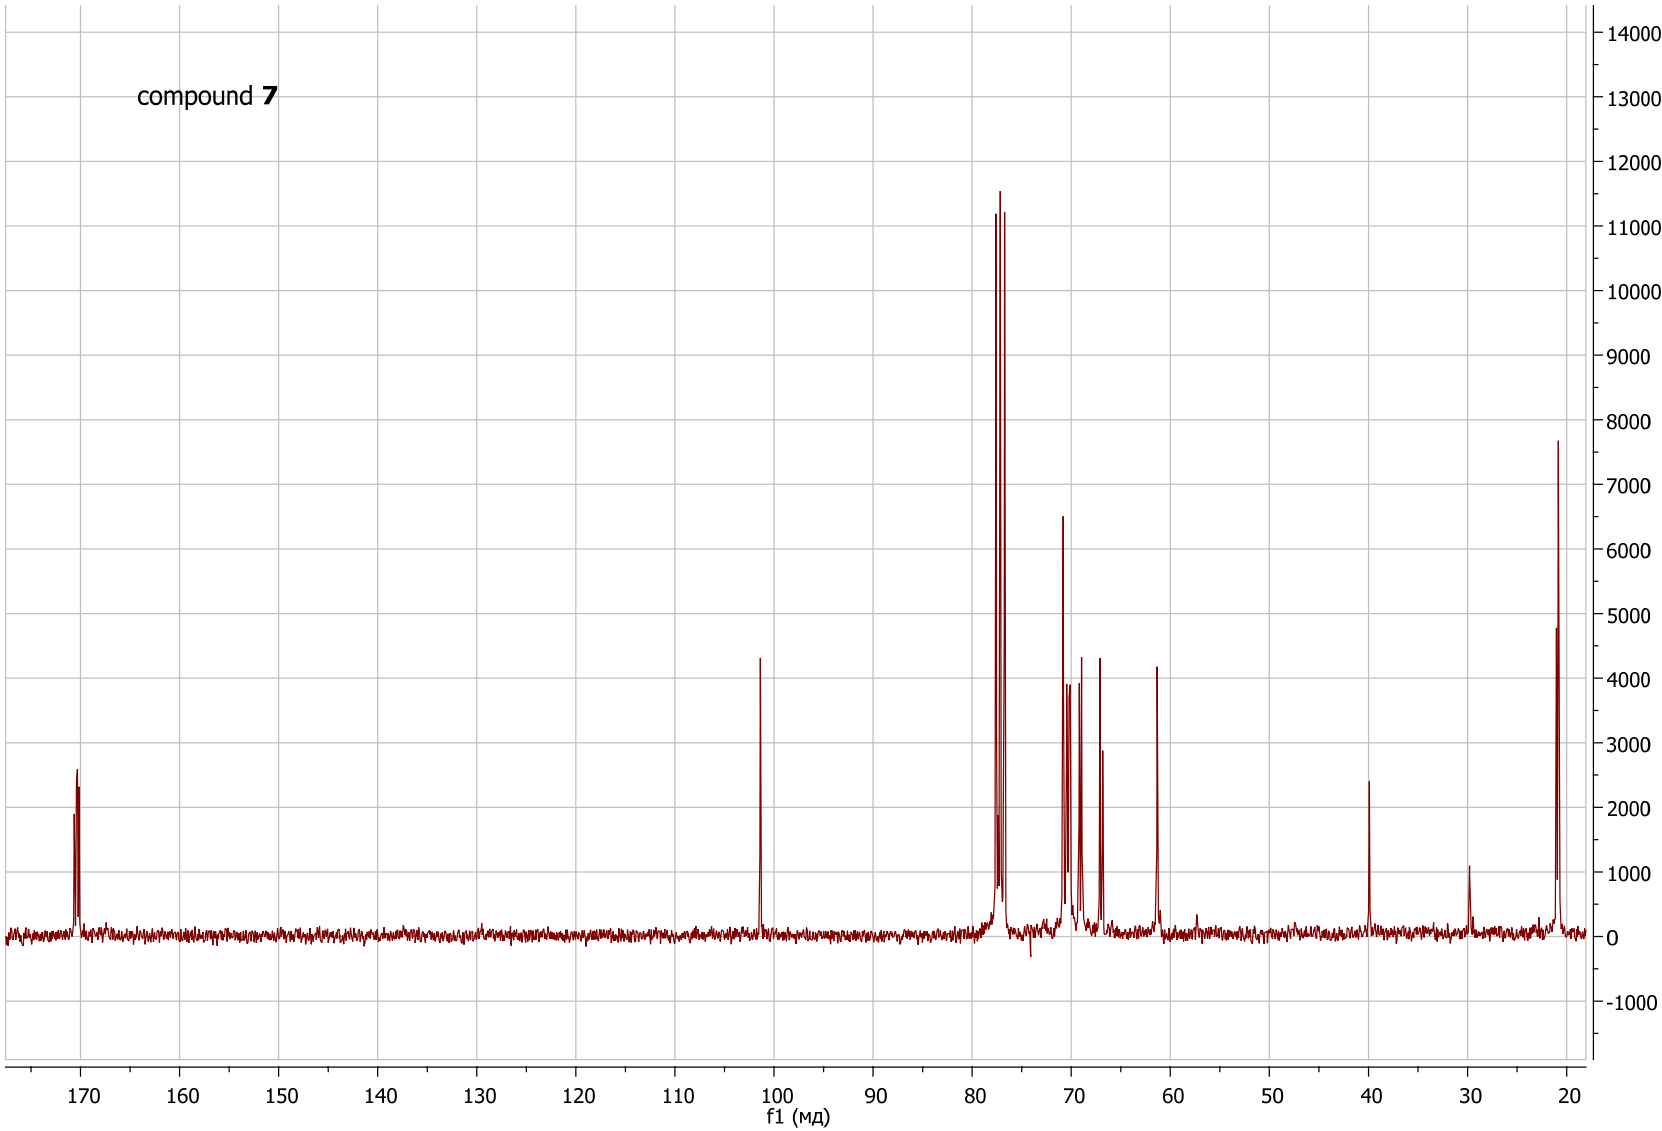

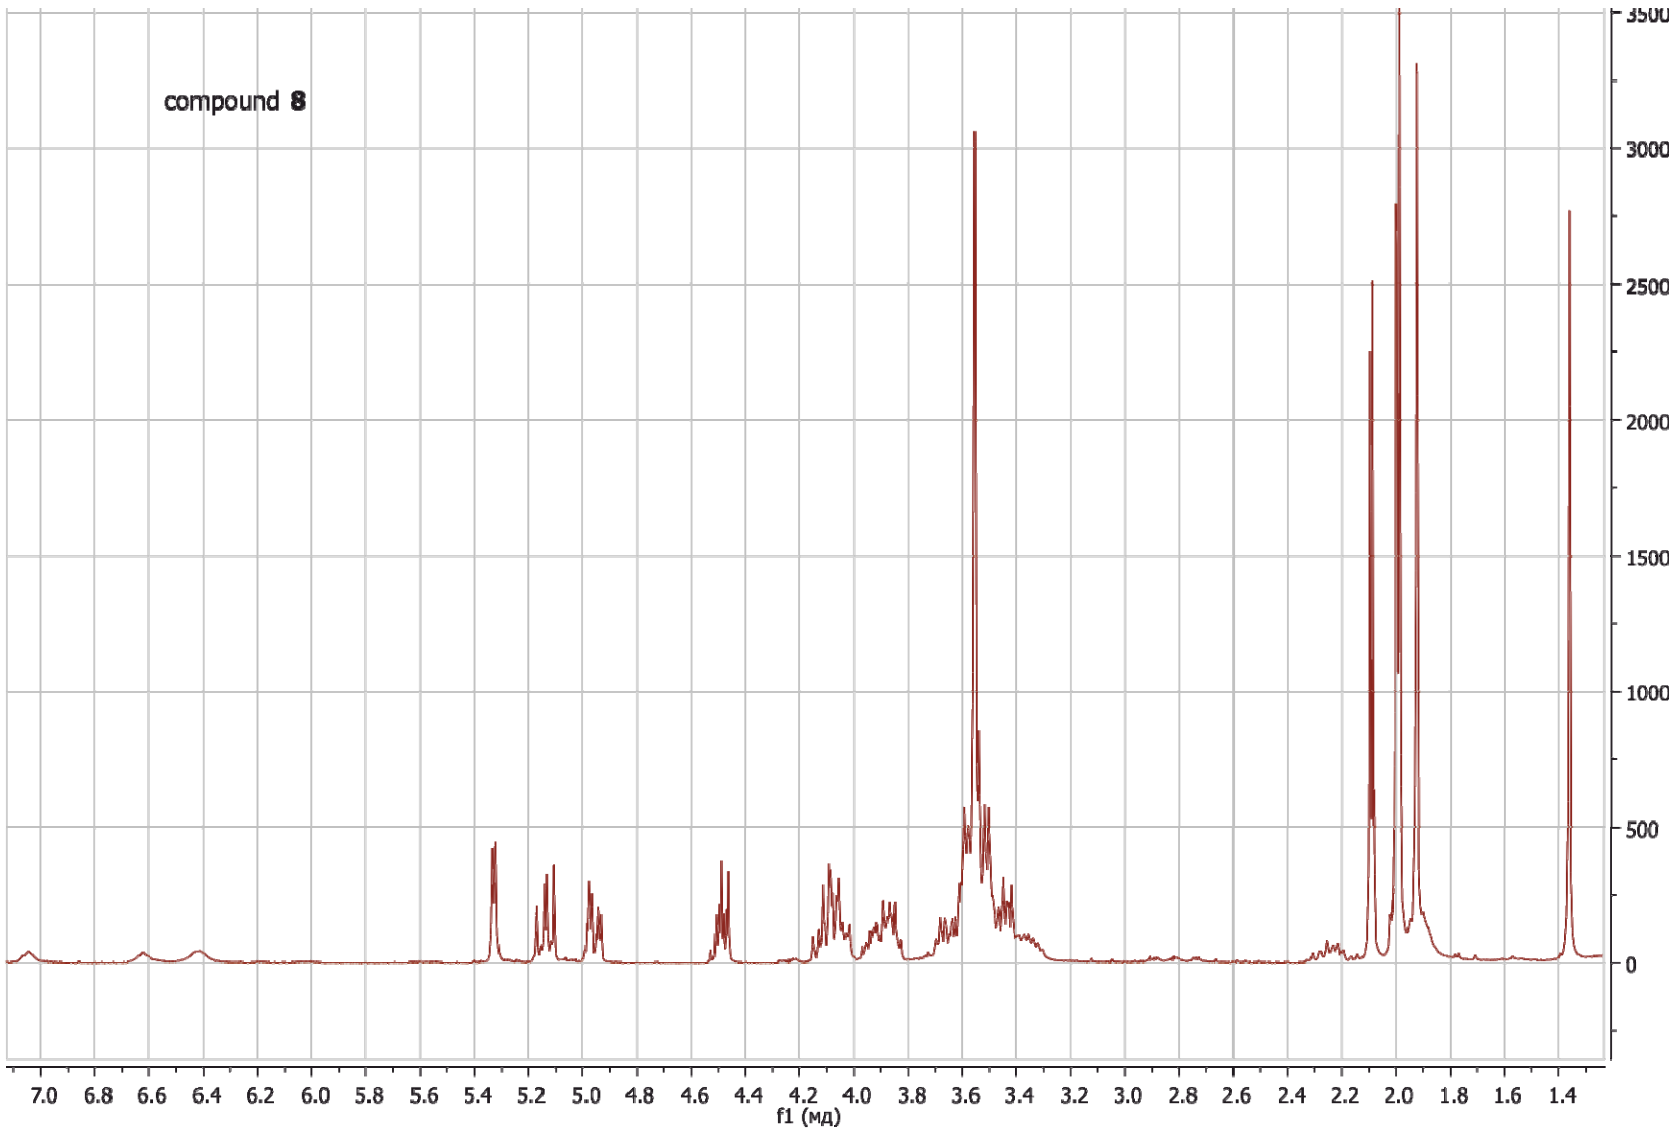

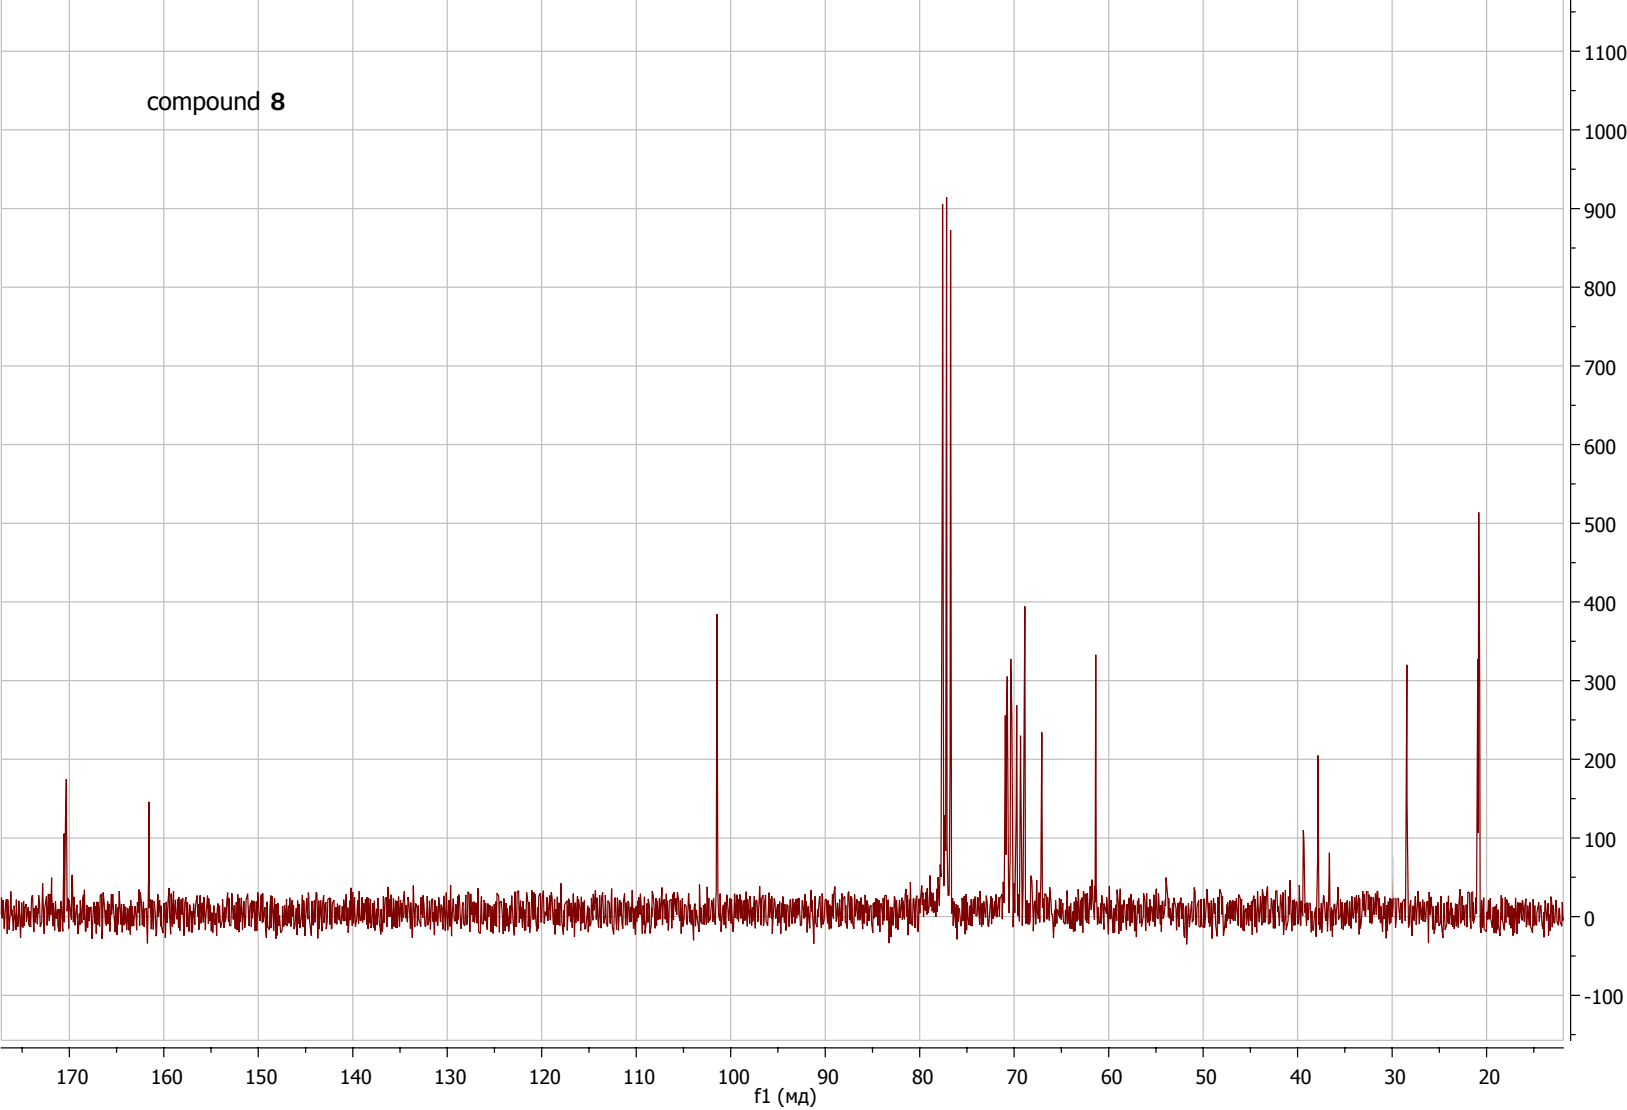

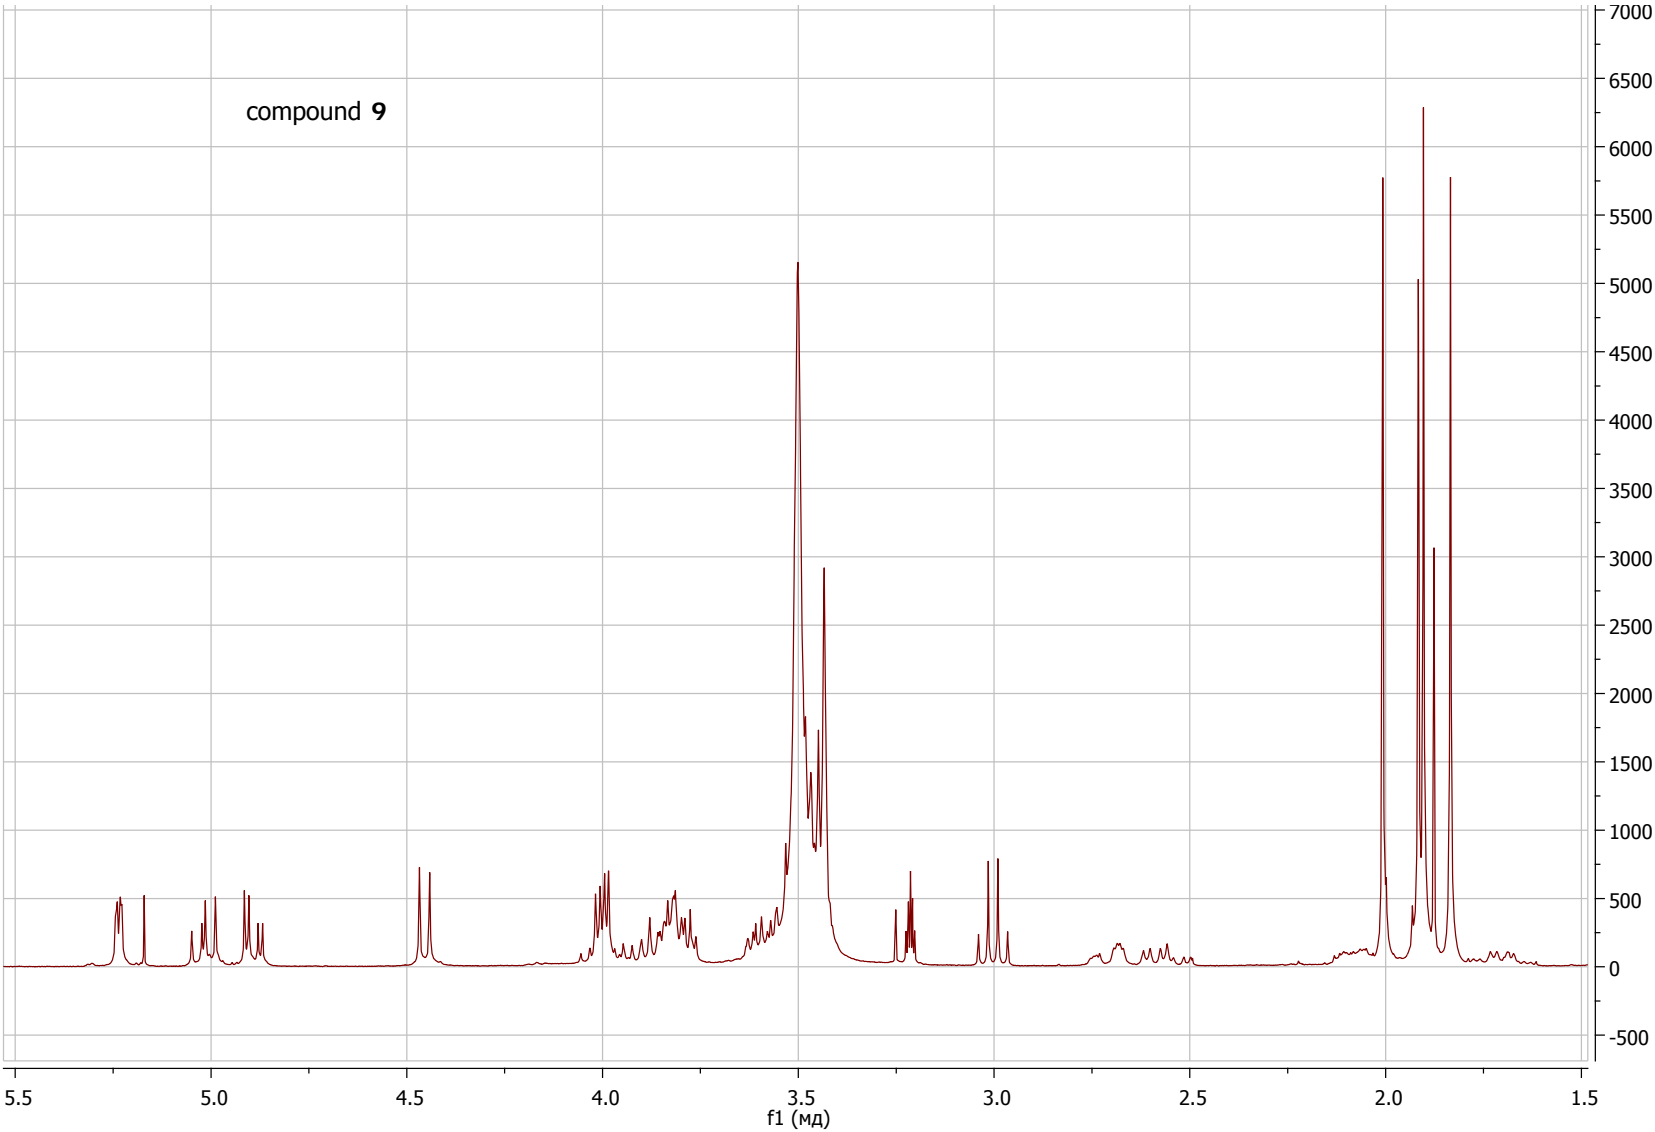

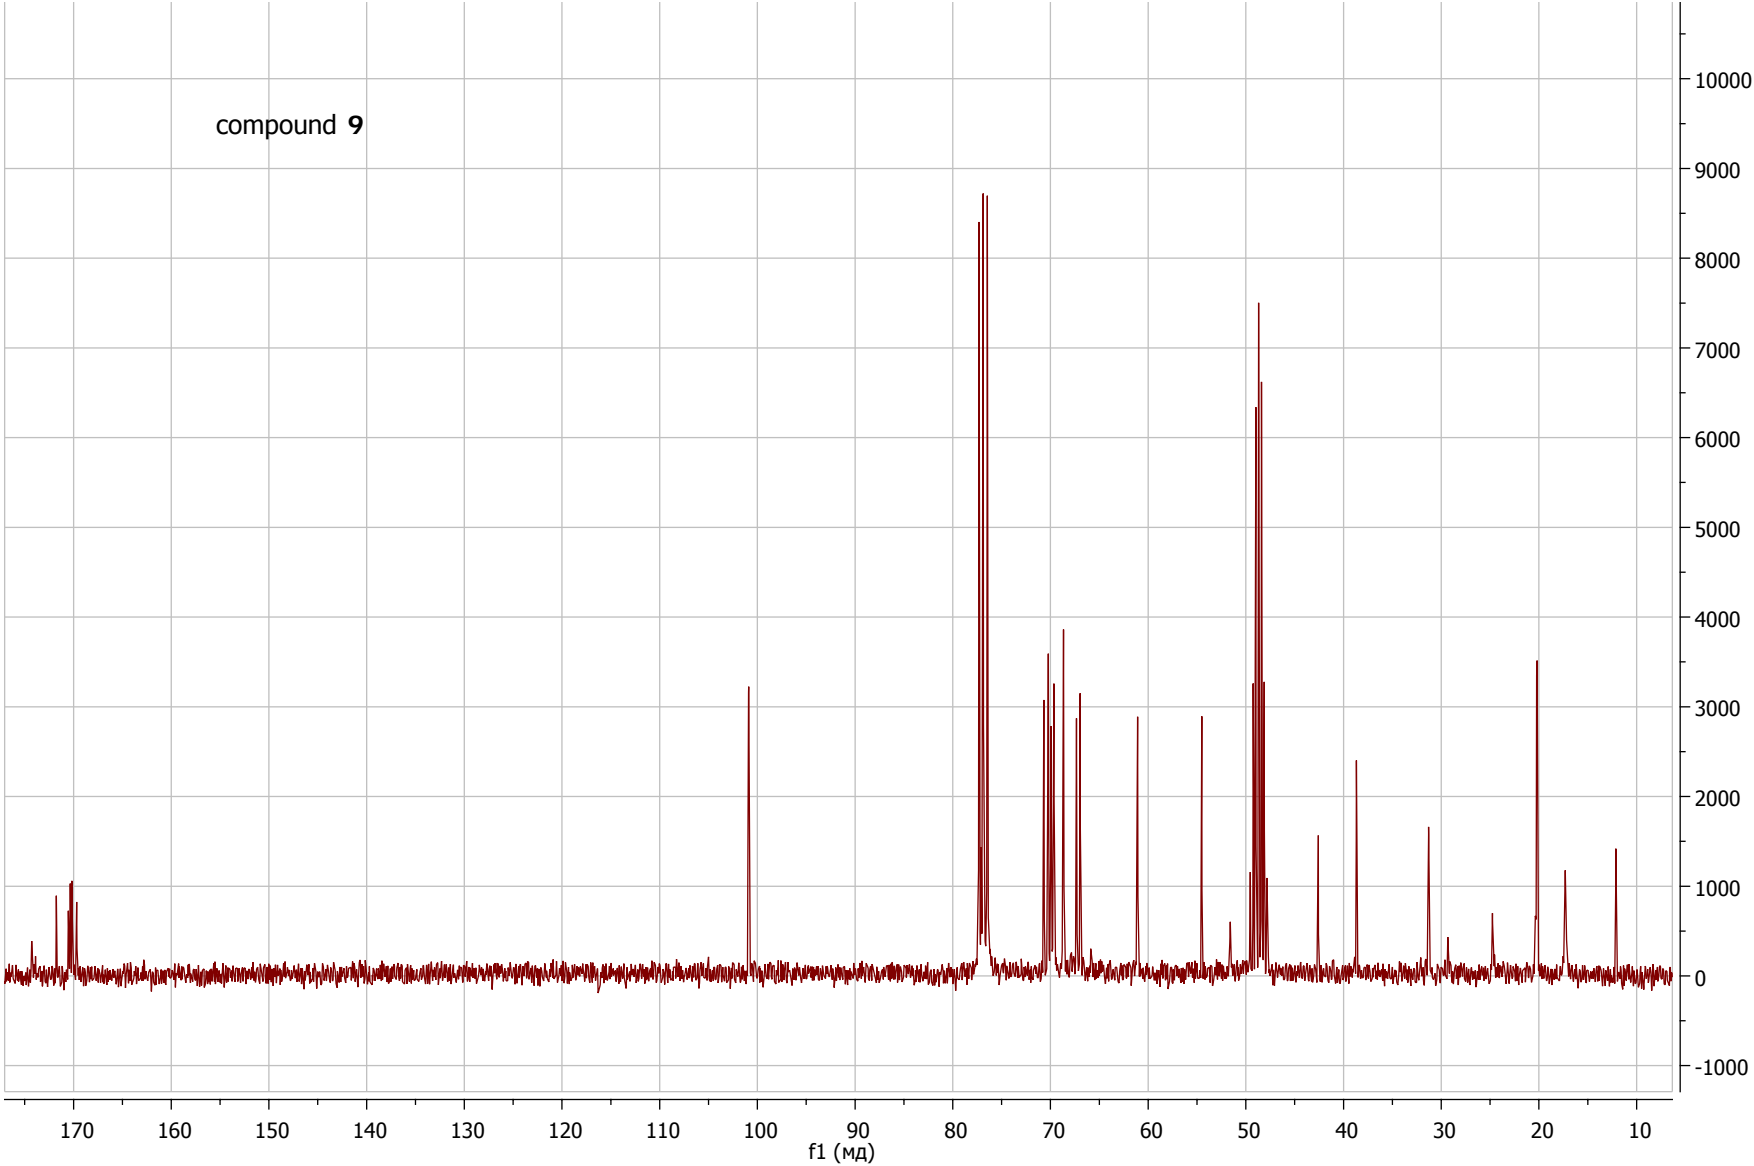

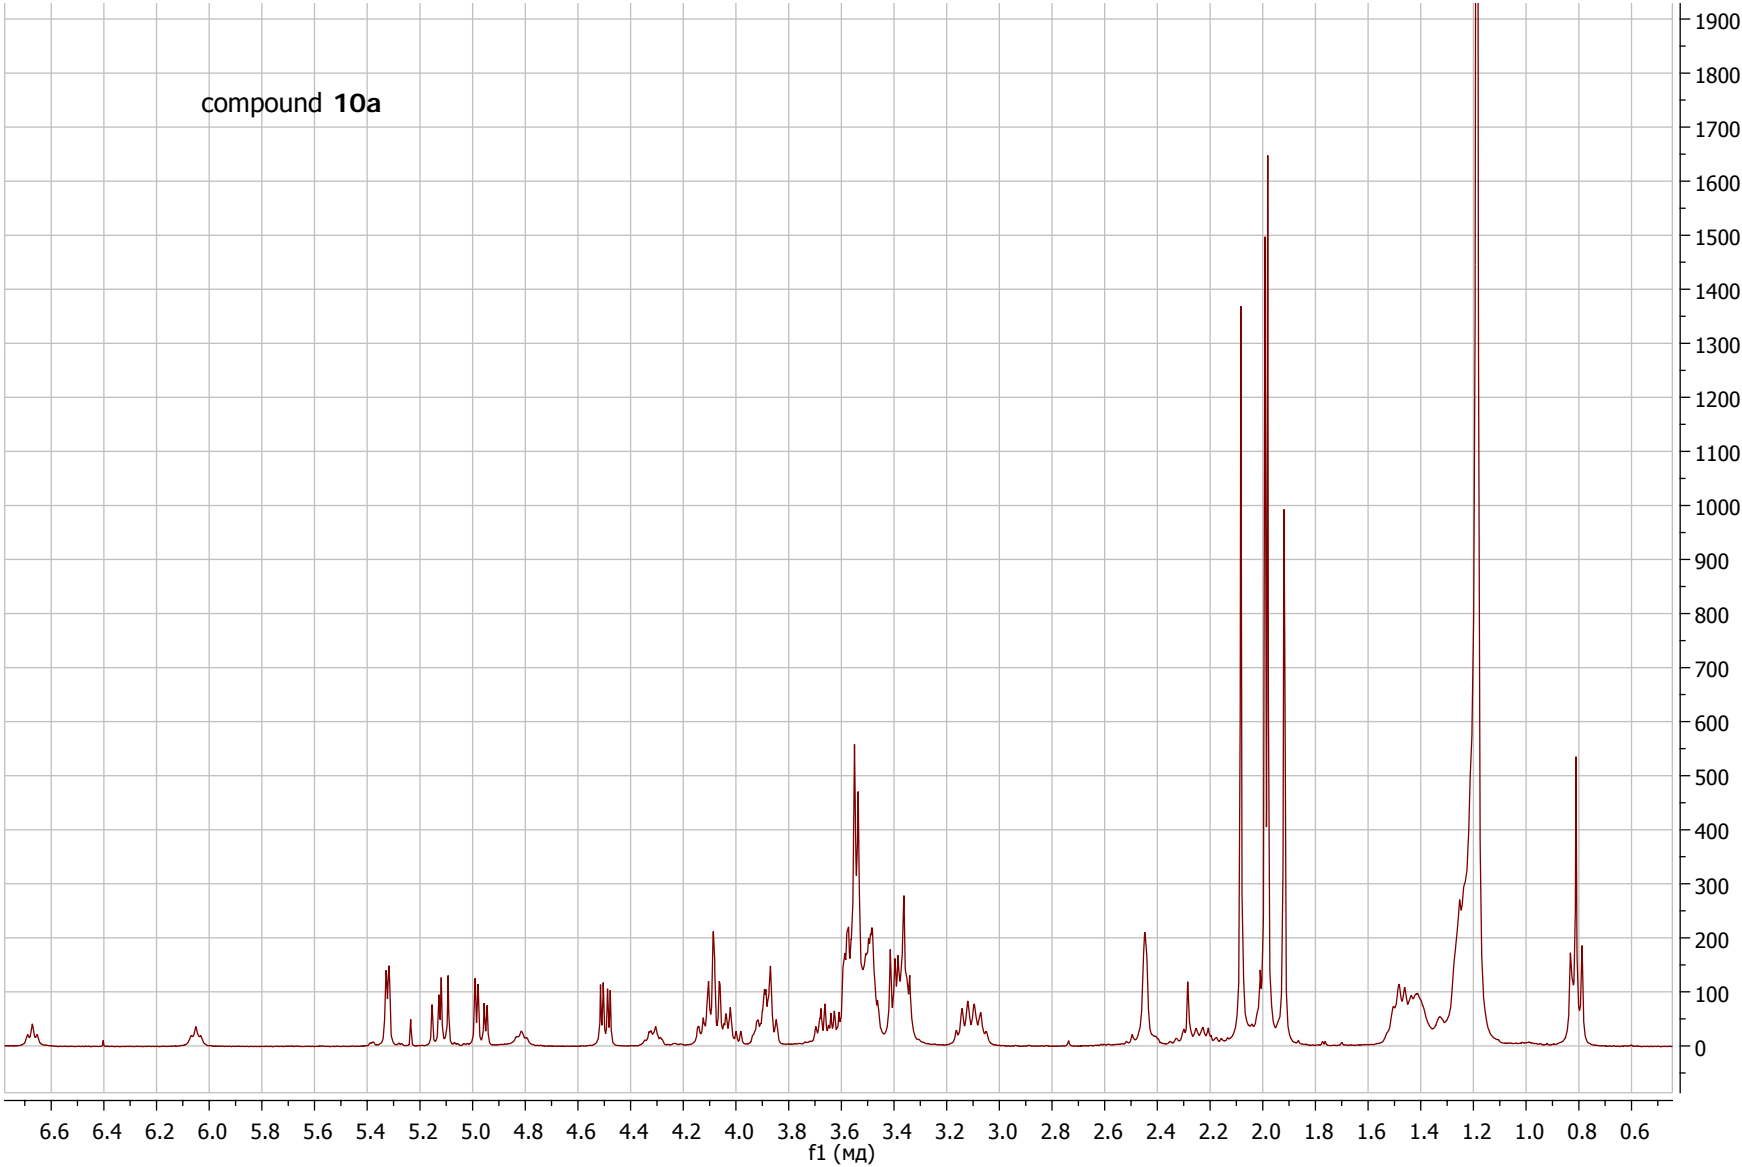

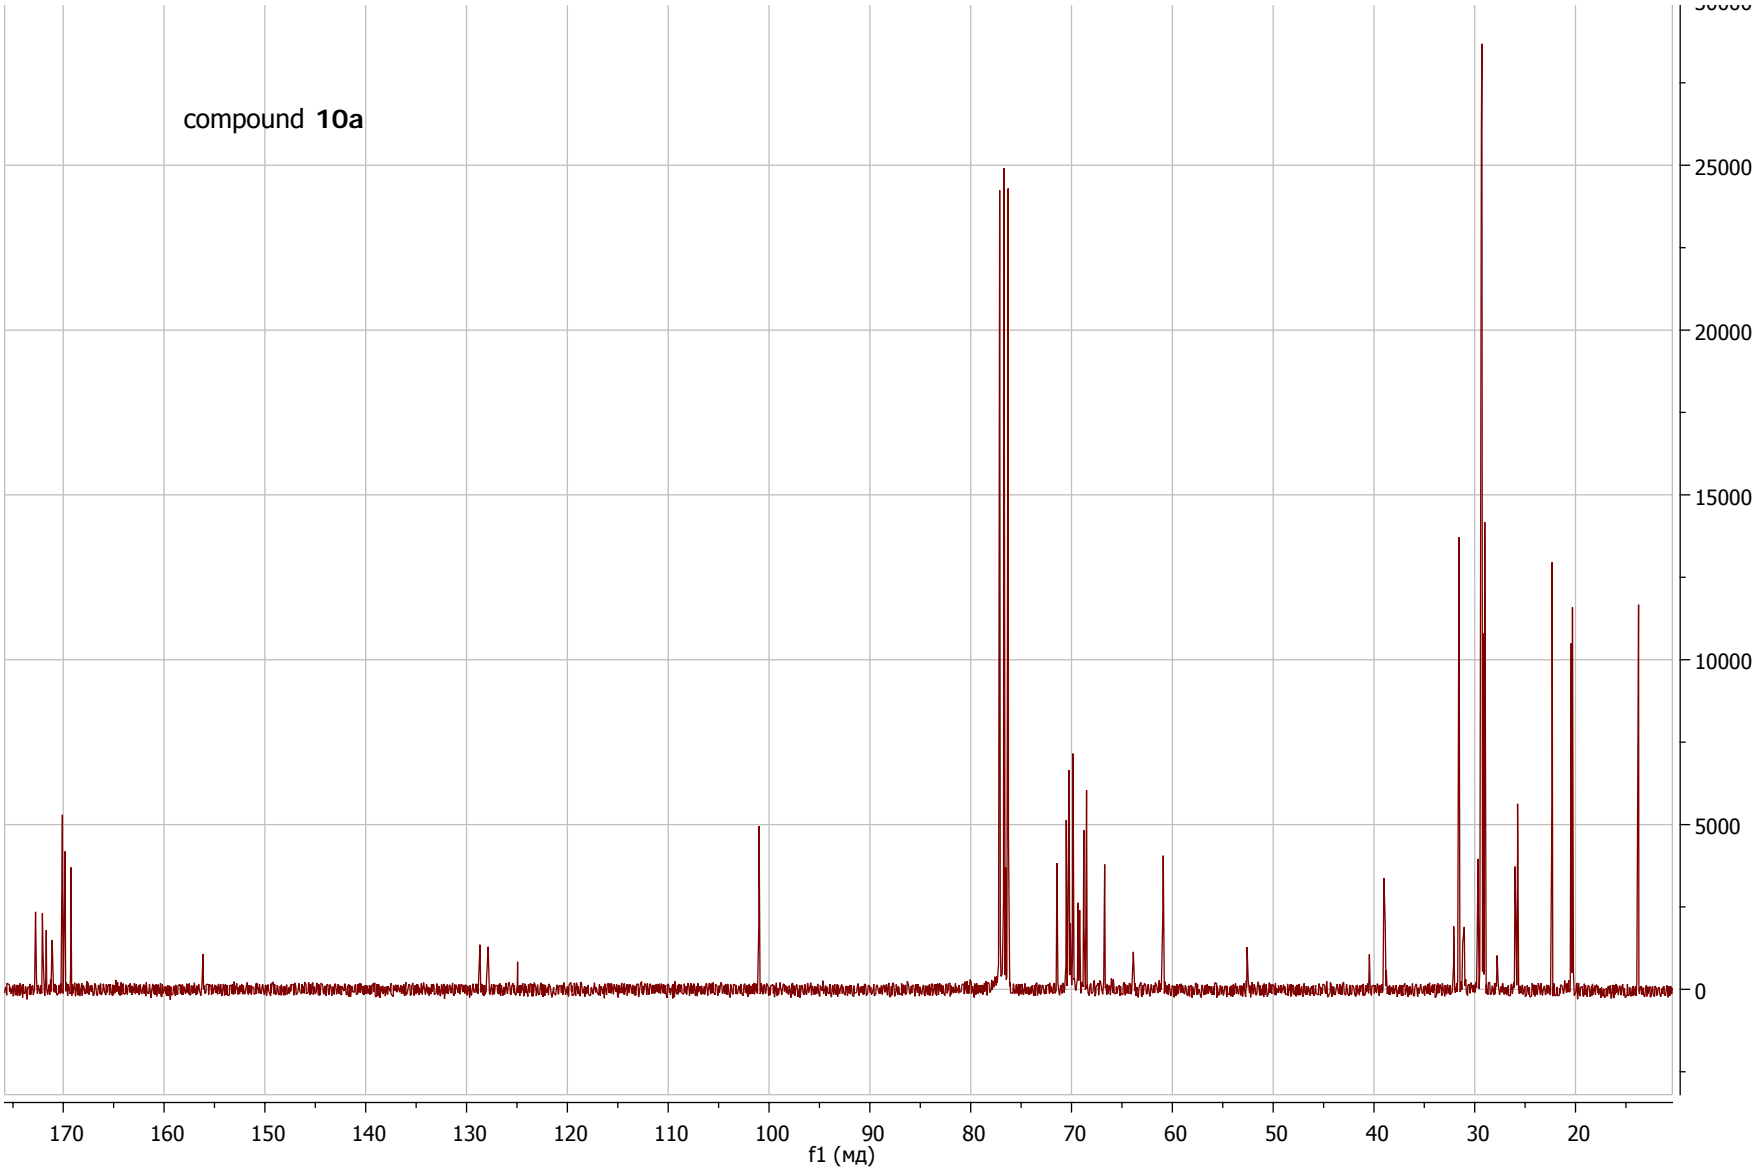

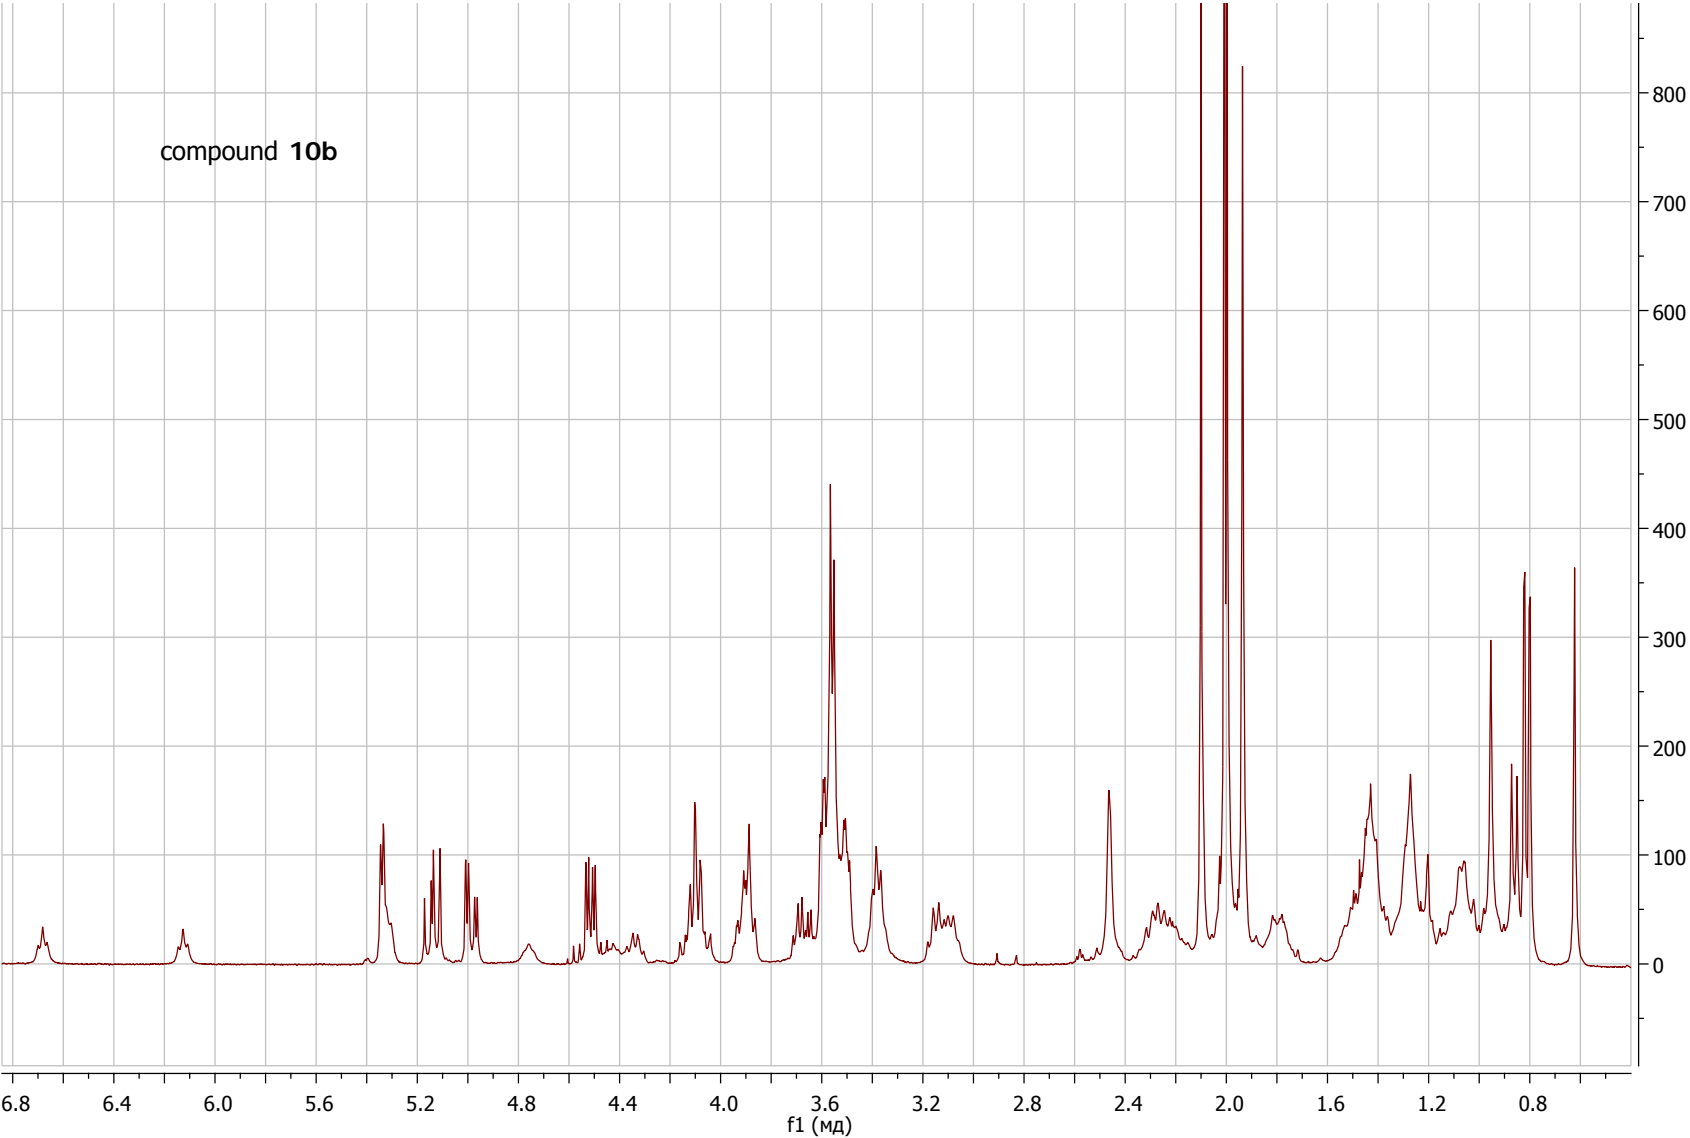

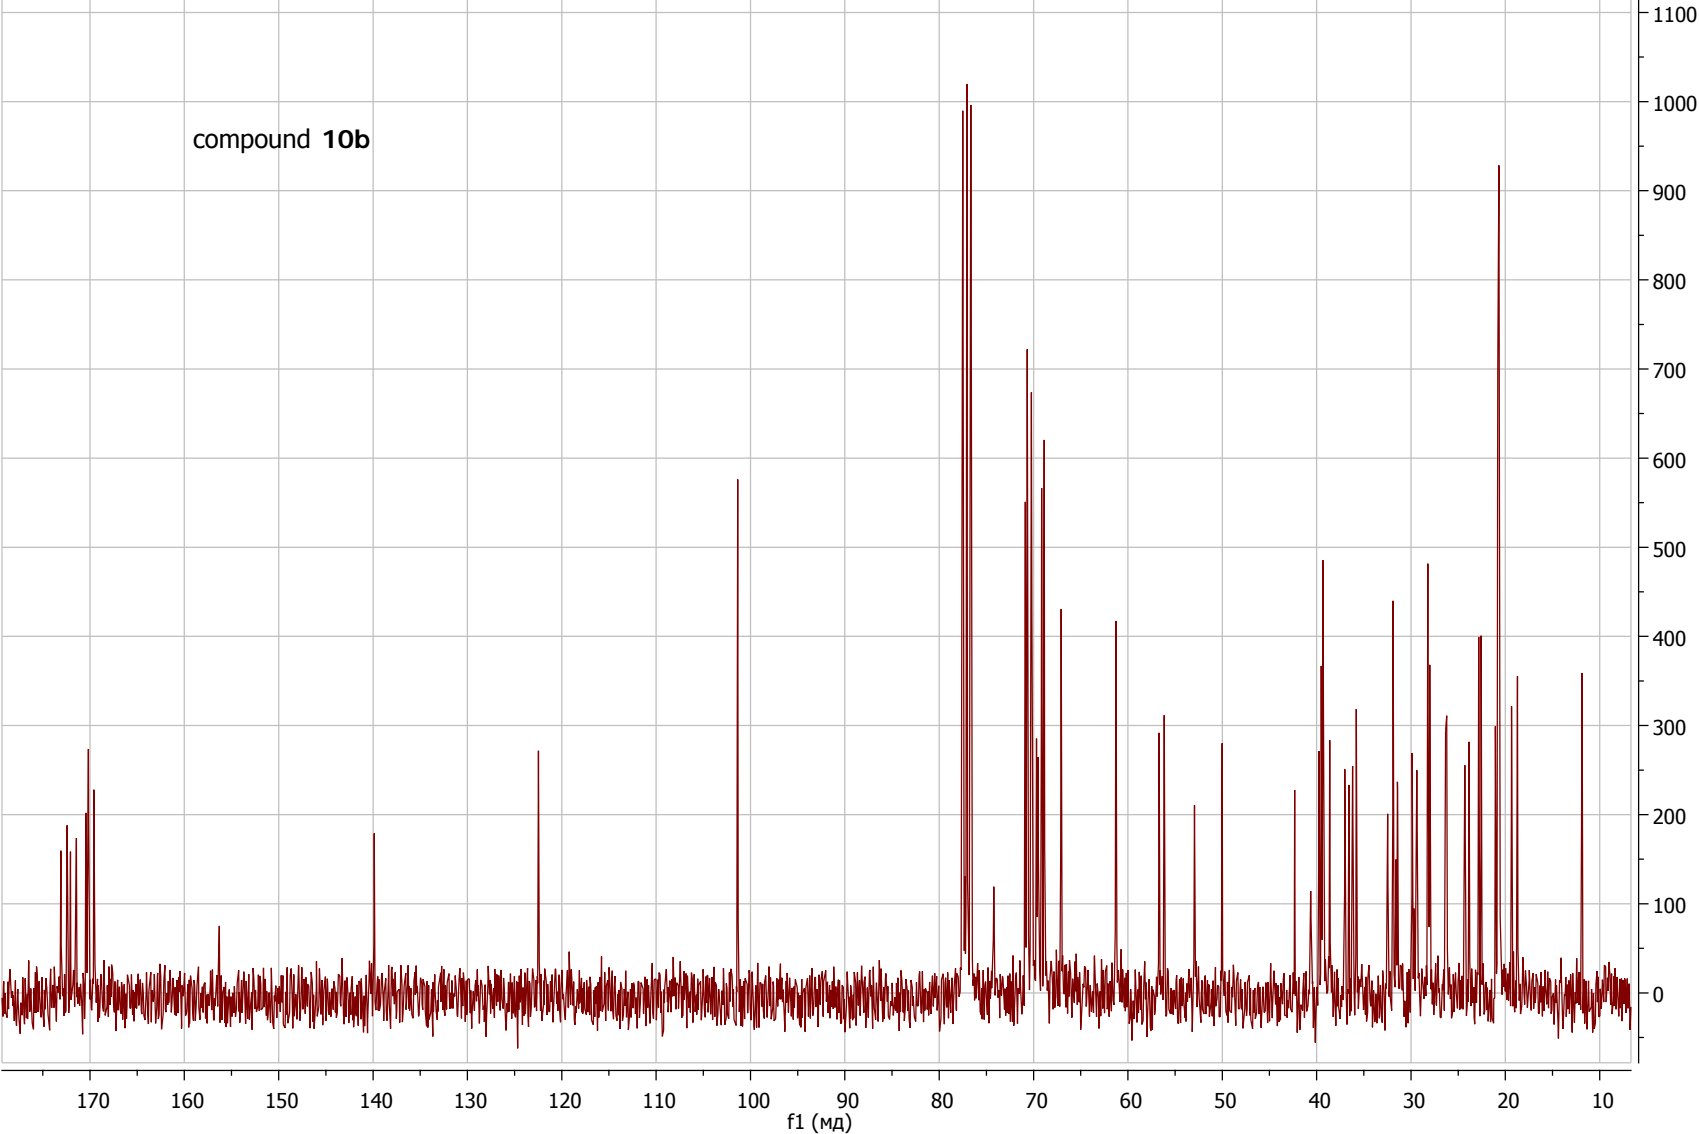

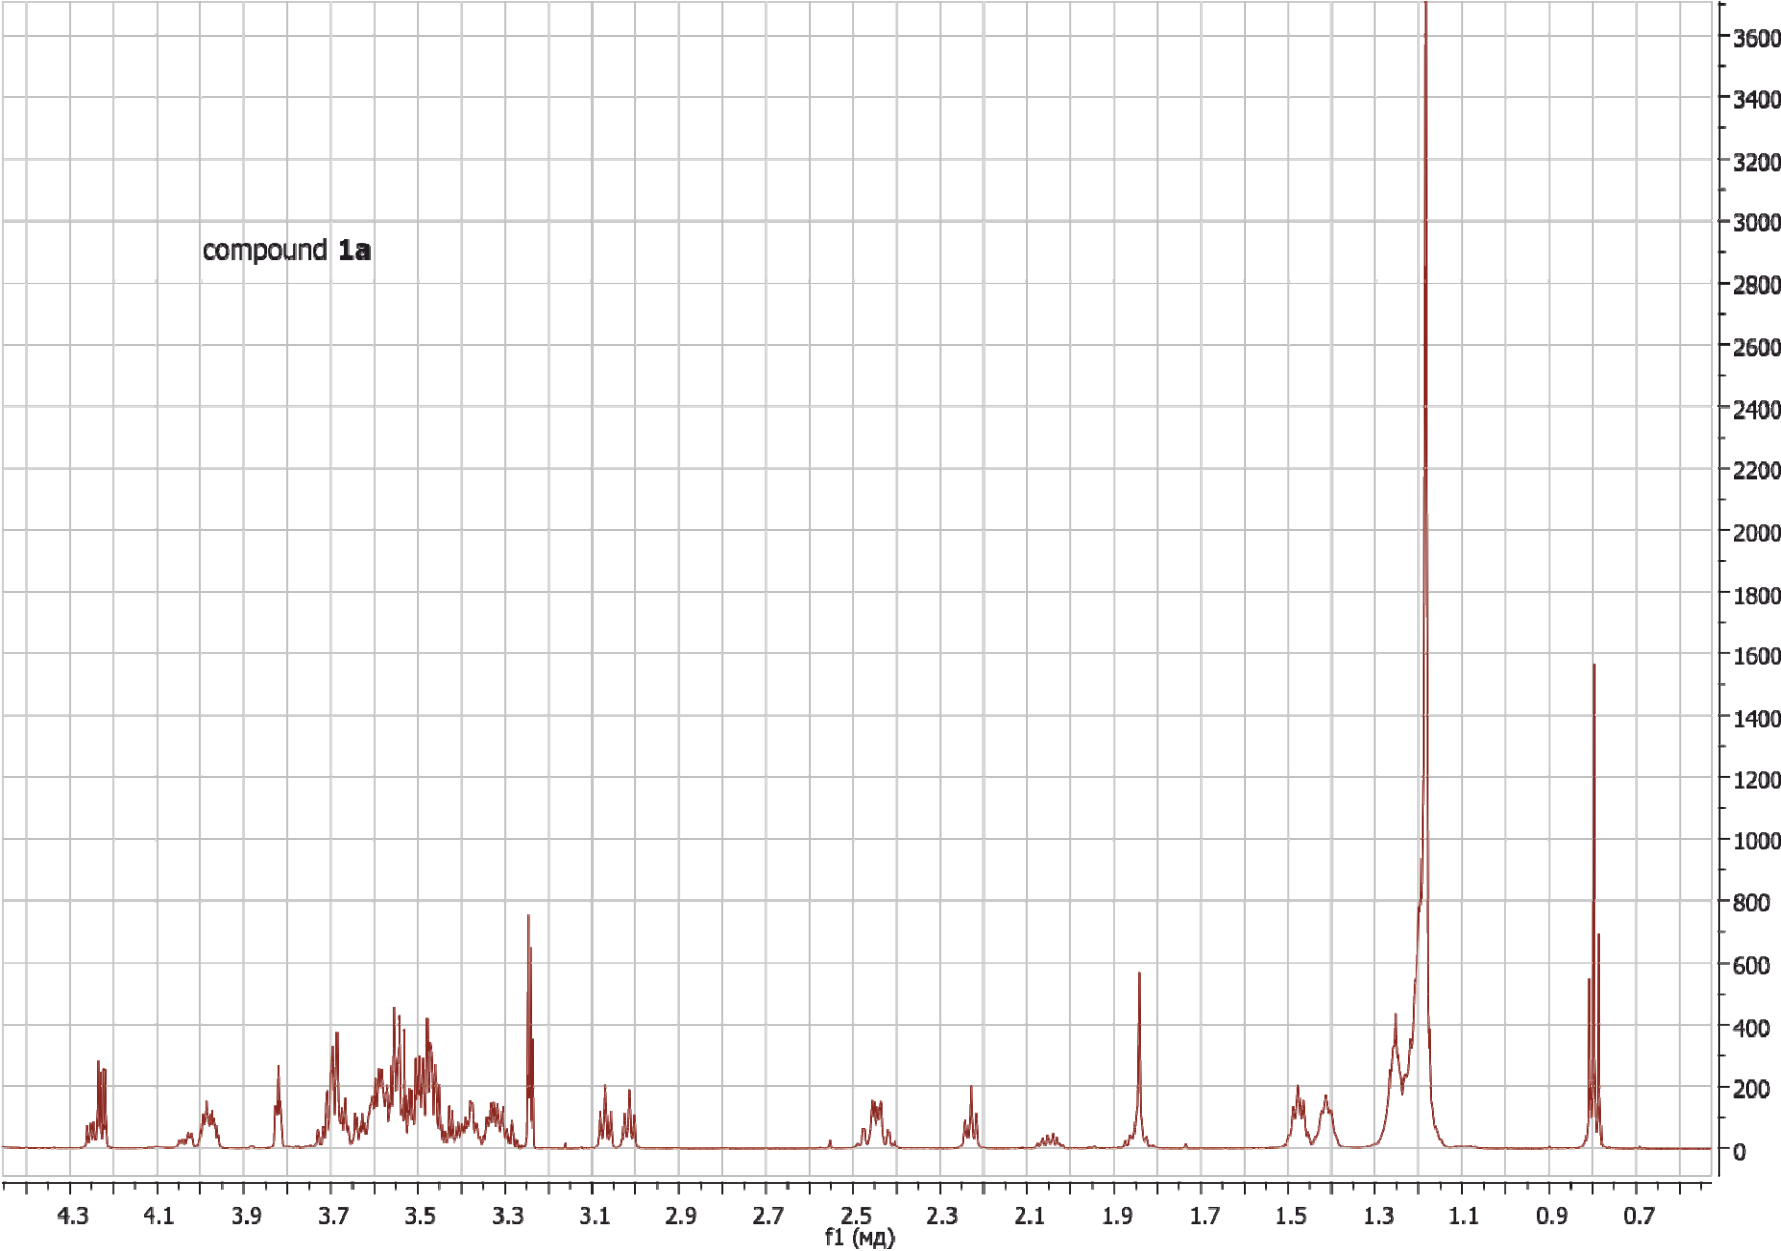

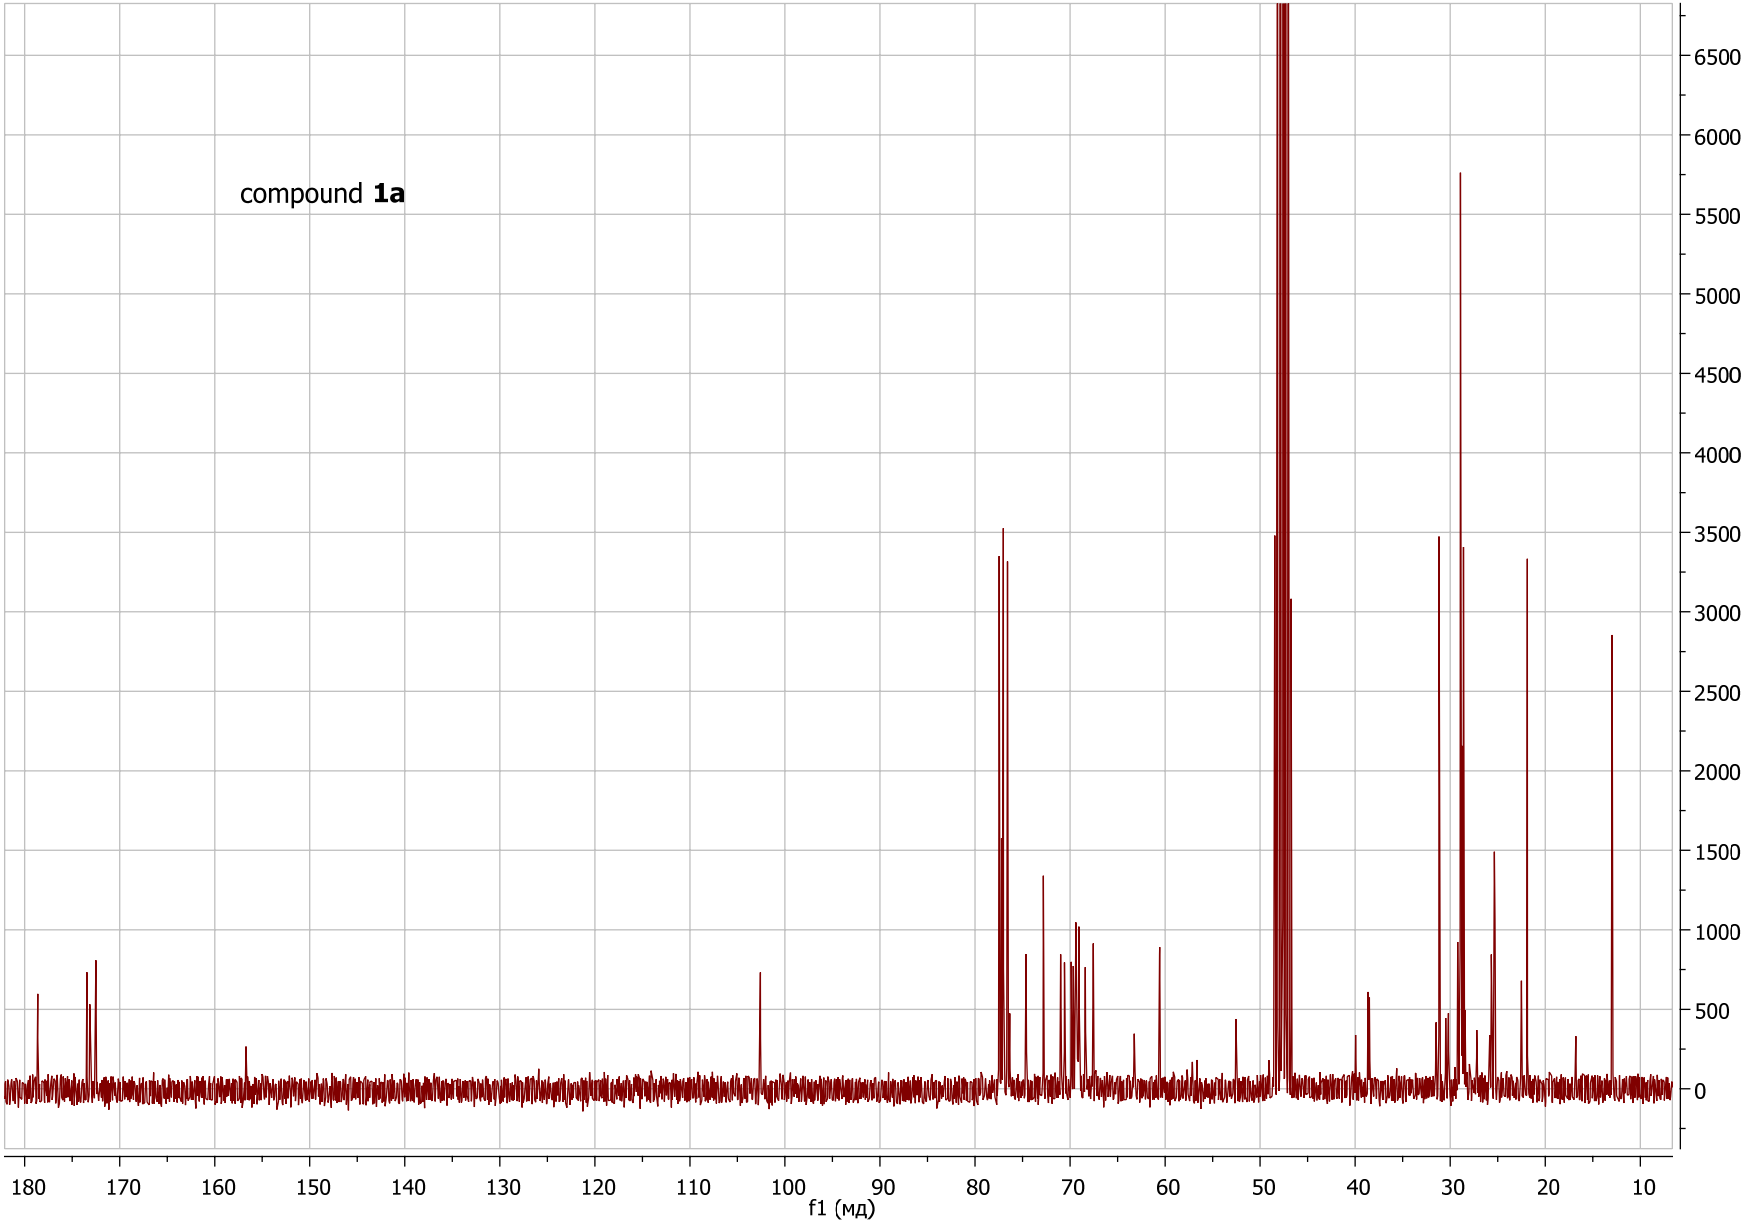

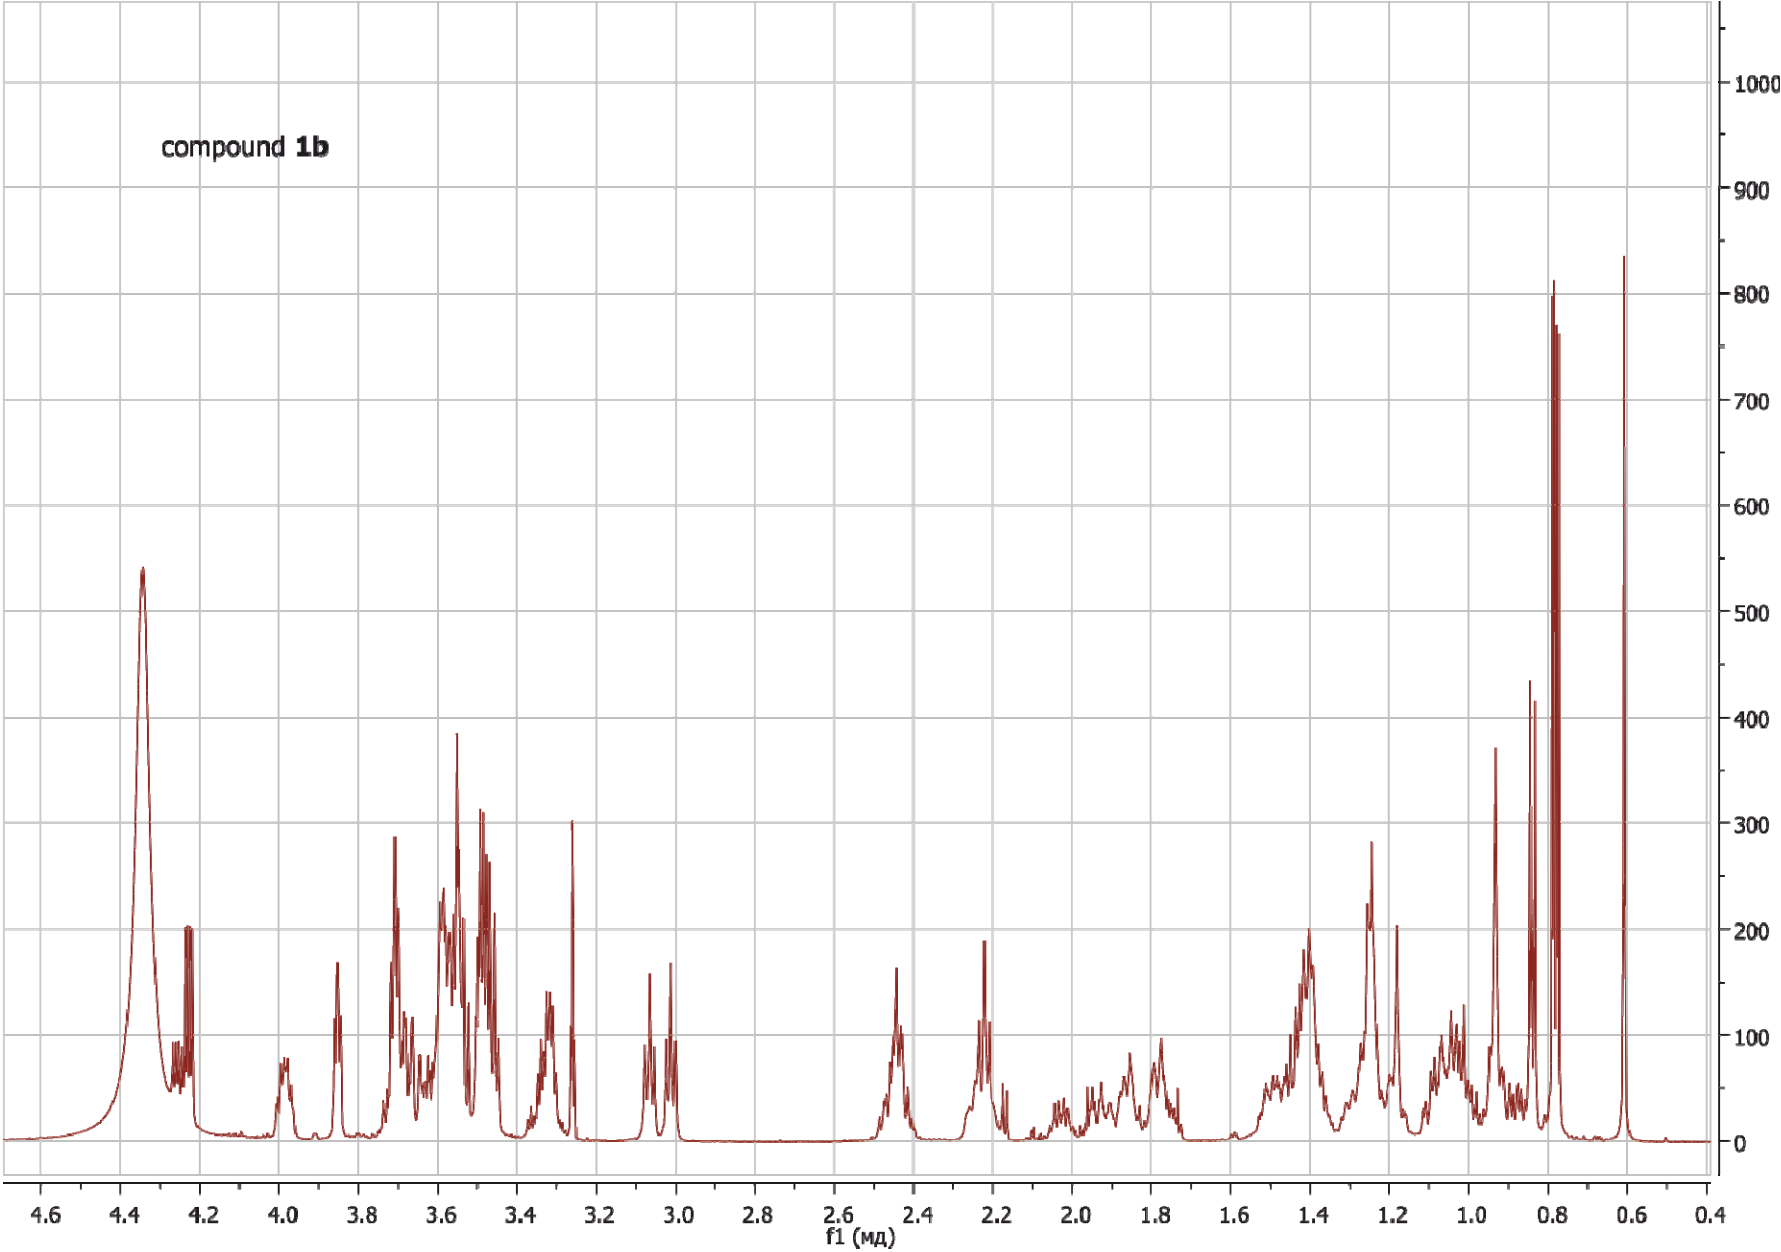

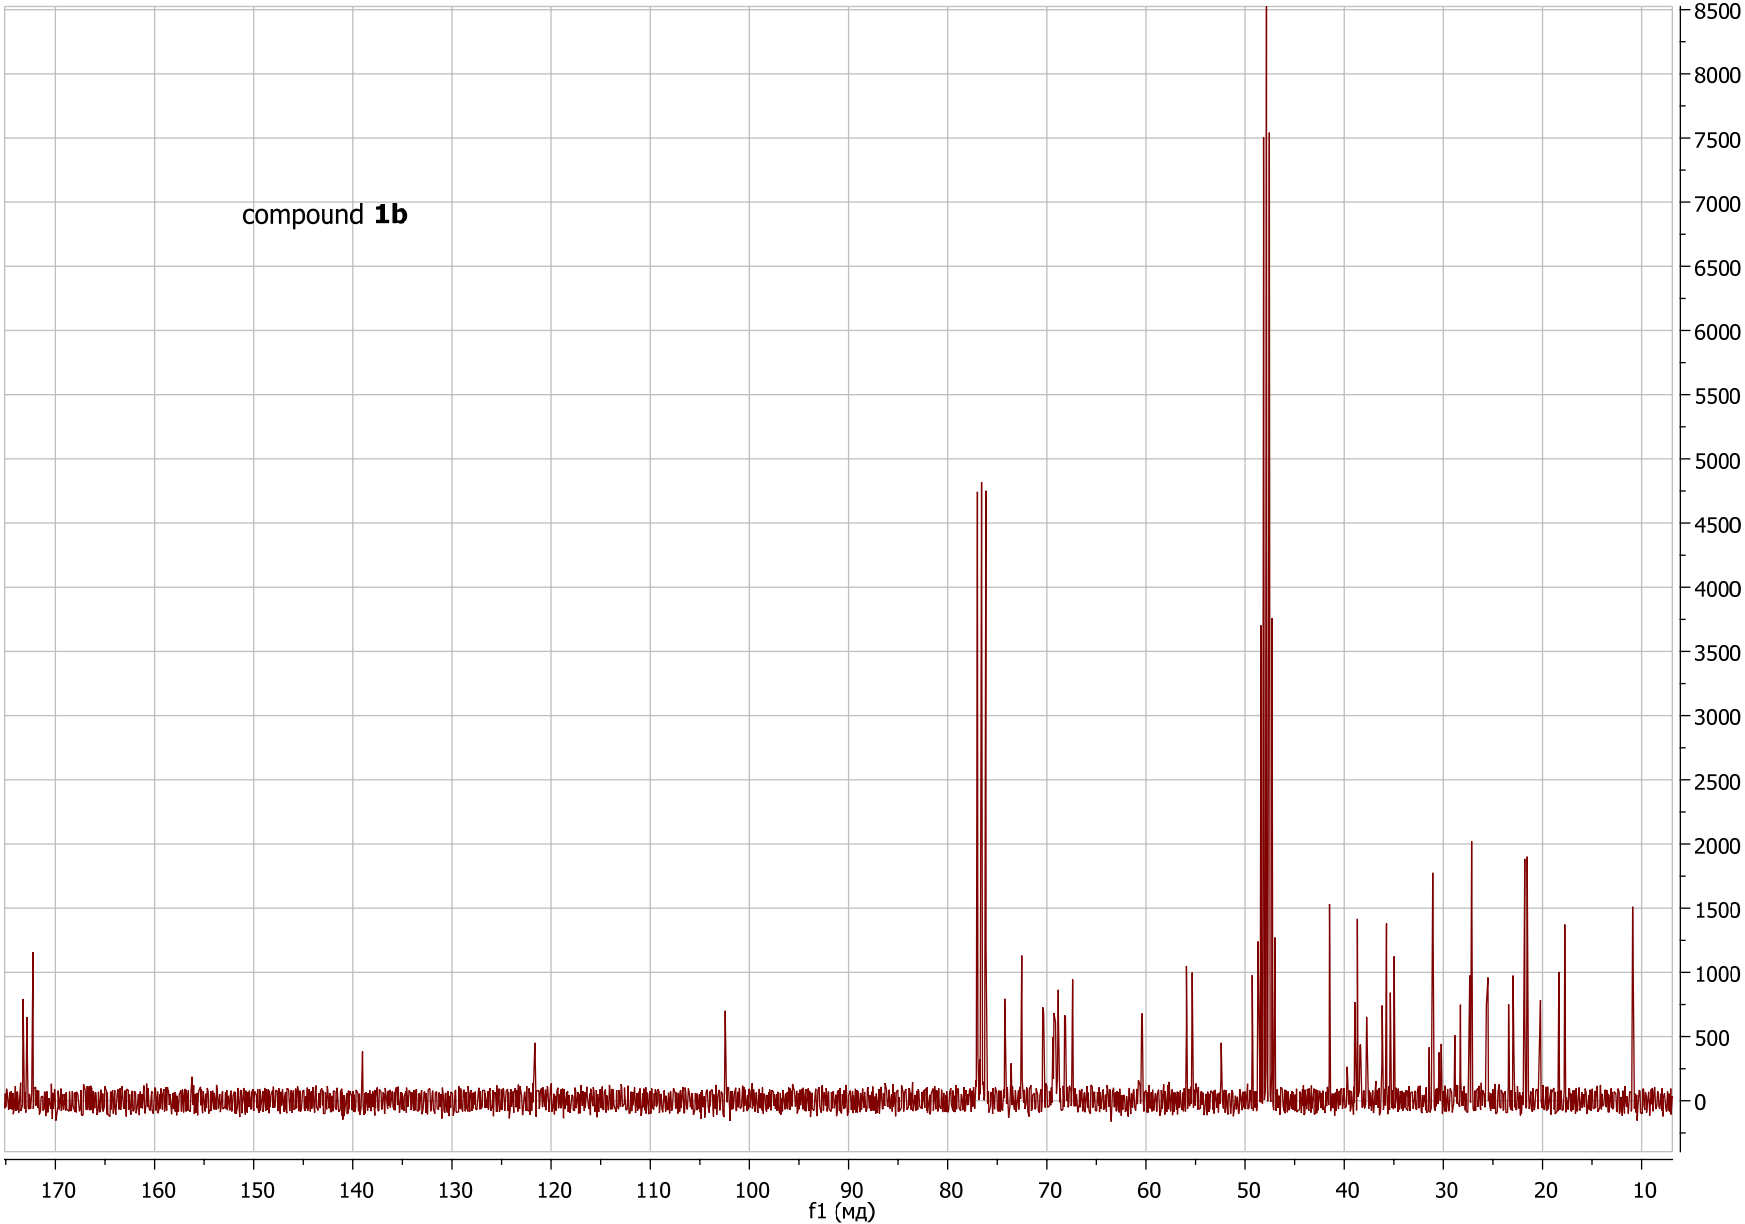

Supplement: c2ra01356h.pdf [file c2ra01356h.pdf]
